# Supplementary material
Source: MDPI journal article supplement (https://www.mdpi.com/2304-6740/12/3/75)
Supplement: s1 [file s1]

**Structural and Spectroscopic Characterization of Co(II) Bis(Benzenedichlorodithiolate): An Intermediate in Hydrogen Evolution Catalysis**

Virginia A. Larson, Jeff W. Kampf and Nicolai Lehnert \*

Department of Chemistry and Department of Biophysics, University of Michigan,  
Ann Arbor, MI 48109-1055, USA; vlarson@umich.edu (V.A.L.)

\* Correspondence: lehnertn@umich.edu

## Table of Contents

|                                                                                                                                                                                                    |    |
|----------------------------------------------------------------------------------------------------------------------------------------------------------------------------------------------------|----|
| <b>Figure S1:</b> Comparison of the UV-Vis spectra of the product of Co(II) oxidation by ambient air and the authentic $[\text{Co}^{\text{III}}(\text{Cl}_2\text{bdt})_2]^-$ starting complex..... | 3  |
| <b>Figure S2:</b> Electrochemical reduction of $[\text{TBA}][\text{Co}^{\text{III}}(\text{Cl}_2\text{bdt})_2]$ to $[\text{TBA}]_2[\text{Co}^{\text{II}}(\text{Cl}_2\text{bdt})_2]$ .....           | 4  |
| <b>Figure S3:</b> UV-Vis spectrum of electrochemically-reduced $[\text{TBA}]_2[\text{Co}^{\text{II}}(\text{Cl}_2\text{bdt})_2]$ , 0.1 mM in MeCN.....                                              | 5  |
| <b>Table S1:</b> Crystal data and structure refinement for $[\text{CoCp}_2]_2[\text{Co}^{\text{II}}(\text{Cl}_2\text{bdt})_2]$ .....                                                               | 6  |
| <b>Table S2:</b> Atomic coordinates and equivalent isotropic displacement parameters for $[\text{CoCp}_2]_2[\text{Co}^{\text{II}}(\text{bdt})_2]$ .....                                            | 7  |
| <b>Table S3:</b> Bond lengths and angles for $[\text{CoCp}_2]_2[\text{Co}^{\text{II}}(\text{bdt})_2]$ .....                                                                                        | 10 |
| <b>Table S4:</b> Anisotropic displacement parameters for $[\text{CoCp}_2]_2[\text{Co}^{\text{II}}(\text{bdt})_2]$ .....                                                                            | 26 |
| <b>Table S5:</b> Hydrogen coordinates and isotropic displacement parameters for $[\text{CoCp}_2]_2[\text{Co}^{\text{II}}(\text{bdt})_2]$ .....                                                     | 29 |
| <b>Table S6:</b> Torsion angles for $[\text{CoCp}_2]_2[\text{Co}^{\text{II}}(\text{bdt})_2]$ .....                                                                                                 | 31 |

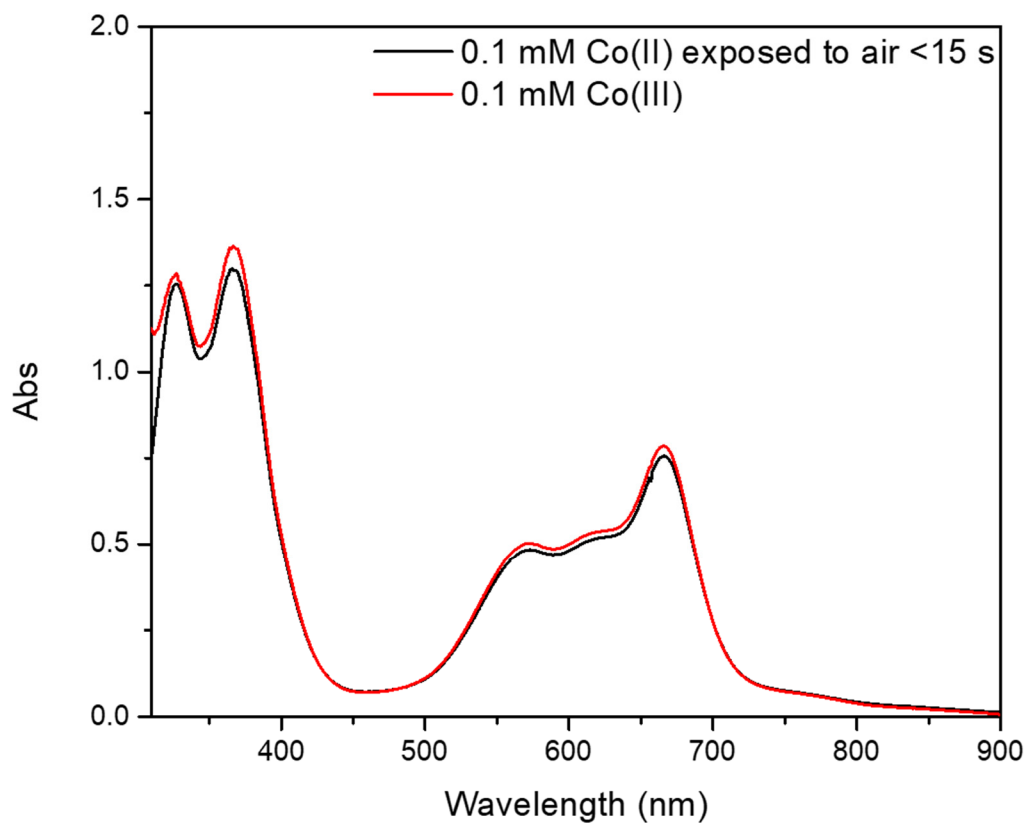

**Figure S1:** Comparison of the UV-Vis spectra of the product of Co(II) oxidation by ambient air and the authentic  $[\text{Co}^{\text{III}}(\text{Cl}_2\text{bdt})_2]$ - starting complex. Both species are 0.1 mM in acetonitrile in the presence of 0.01 M  $[\text{TBA}](\text{PF}_6)$ . The black spectrum, the oxidized Co(II) complex, was obtained by mixing 0.1 mL anaerobic 1 mM  $[\text{TBA}]_2[\text{Co}^{\text{II}}(\text{Cl}_2\text{bdt})_2]$  formed by electrochemical reduction with 0.9 mL acetonitrile under ambient conditions (in air).

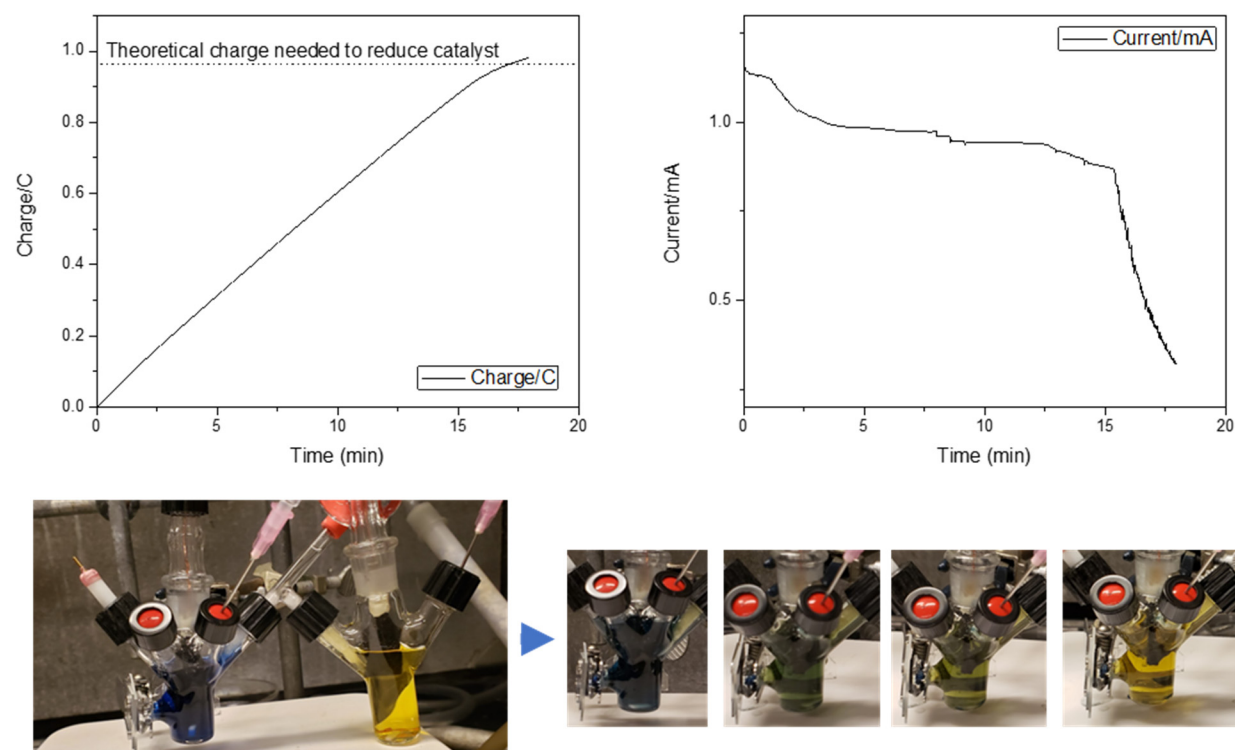

**Figure S2:** Electrochemical reduction of  $[\text{TBA}][\text{Co}^{\text{III}}(\text{Cl}_2\text{bdt})_2]$  to  $[\text{TBA}]_2[\text{Co}^{\text{II}}(\text{Cl}_2\text{bdt})_2]$ . Experimental conditions: 1 mM  $[\text{TBA}][\text{Co}^{\text{III}}(\text{Cl}_2\text{bdt})_2]$ , 0.1 M  $[\text{TBA}](\text{PF}_6)$ , MeCN, under Ar on the Schlenk line (working electrode/reference electrode half-cell), 10 mM Fc (counter electrode half-cell), glass wool salt bridge, Ag wire pseudo-reference electrode, graphitic carbon felt for the working and counter electrodes.

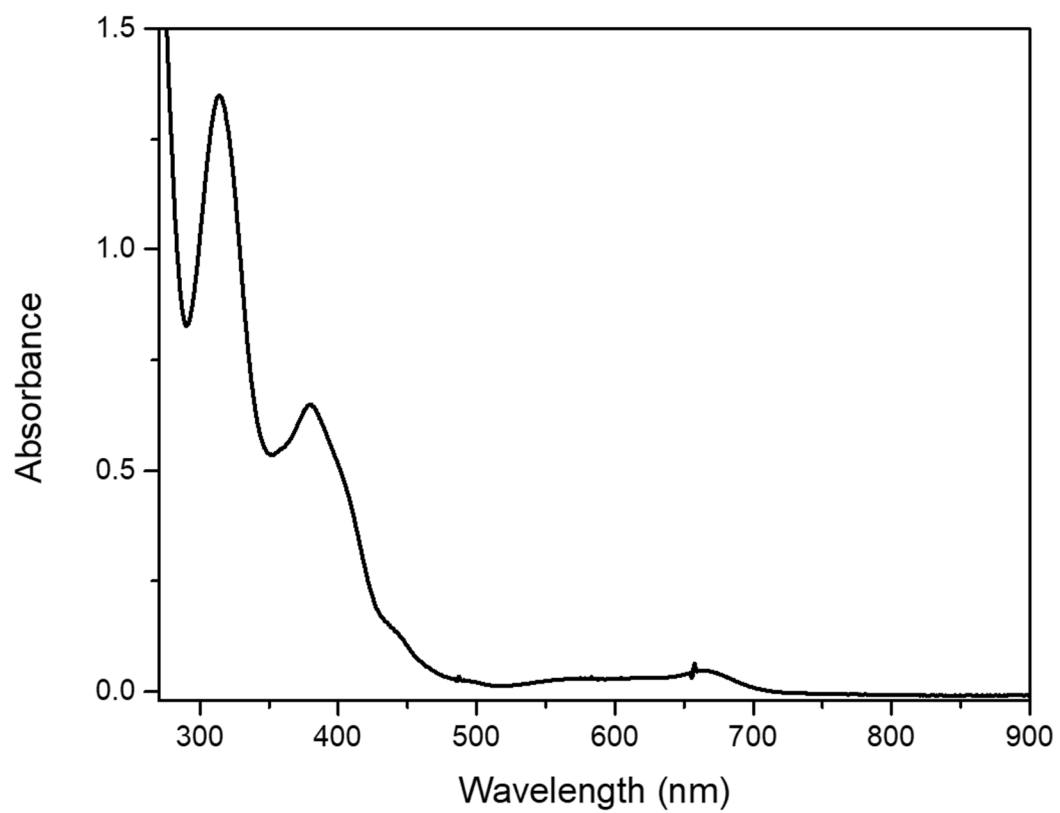

**Figure S3:** UV-Vis spectrum of electrochemically reduced  $[\text{TBA}]_2[\text{Co}^{\text{II}}(\text{Cl}_2\text{bdt})_2]$ , 0.1 mM in MeCN, at room temperature.

**Table S1:** Crystal data and structure refinement for [CoCp<sub>2</sub>]<sub>2</sub>[Co<sup>II</sup>(bdt)<sub>2</sub>]. One equivalent of butyronitrile is also present but omitted from Figure 2 for clarity.

| Parameter                         | Value(s)                                                                        |                     |
|-----------------------------------|---------------------------------------------------------------------------------|---------------------|
| Empirical formula                 | C <sub>36</sub> H <sub>31</sub> Cl <sub>4</sub> Co <sub>3</sub> NS <sub>4</sub> |                     |
| Formula weight                    | 924.45                                                                          |                     |
| Temperature                       | 85(2) K                                                                         |                     |
| Wavelength                        | 1.54184 Å                                                                       |                     |
| Crystal system, space group       | Monoclinic, P2(1)                                                               |                     |
| Unit cell dimensions              | a = 14.3219(2) Å                                                                | alpha = 90°         |
|                                   | b = 14.0160(2) Å                                                                | beta = 99.4507(17)° |
|                                   | c = 18.4173(3) Å                                                                | gamma = 90°         |
| Volume                            | 3646.82(11) Å <sup>3</sup>                                                      |                     |
| Z, Calculated density             | 4, 1.684 Mg/m <sup>3</sup>                                                      |                     |
| Absorption coefficient            | 15.627 mm <sup>-1</sup>                                                         |                     |
| F(000)                            | 1868                                                                            |                     |
| Crystal size                      | 0.100 x 0.080 x 0.040 mm                                                        |                     |
| Theta range for data collection   | 2.432 to 69.427°                                                                |                     |
| Limiting indices                  | -17<=h<=17, -16<=k<=17, -22<=l<=22                                              |                     |
| Reflections collected / unique    | 55226 / 12797 [R(int) = 0.0759]                                                 |                     |
| Completeness to theta = 67.684    | 99.8 %                                                                          |                     |
| Absorption correction             | Semi-empirical from equivalents                                                 |                     |
| Max. and min. transmission        | 1.00000 and 0.64347                                                             |                     |
| Refinement method                 | Full-matrix least-squares on F <sup>2</sup>                                     |                     |
| Data / restraints / parameters    | 12797 / 119 / 924                                                               |                     |
| Goodness-of-fit on F <sup>2</sup> | 1.069                                                                           |                     |
| Final R indices [I>2sigma(I)]     | R1 = 0.0642, wR2 = 0.1634                                                       |                     |
| R indices (all data)              | R1 = 0.0708, wR2 = 0.1712                                                       |                     |
| Absolute structure parameter      | 0.139(6)                                                                        |                     |
| Extinction coefficient            | n/a                                                                             |                     |
| Largest diff. peak and hole       | 0.736 and -0.794 e.Å <sup>-3</sup>                                              |                     |

**Table S2:** Atomic coordinates ( $\times 10^4$ ) and equivalent isotropic displacement parameters ( $\text{\AA}^2 \times 10^3$ ) for  $[\text{CoCp}_2]_2[\text{Co}^{\text{II}}(\text{bdt})_2]$ .  $U(\text{eq})$  is defined as one third of the trace of the orthogonalized  $U_{ij}$  tensor.

|       | x        | y        | z       | U(eq) |
|-------|----------|----------|---------|-------|
| Co(1) | 2370(1)  | 9893(1)  | 1294(1) | 33(1) |
| Co(2) | 2572(1)  | 9861(1)  | 6219(1) | 34(1) |
| Co(3) | 1230(2)  | 399(2)   | 8290(1) | 60(1) |
| Co(4) | 4110(1)  | 6818(2)  | 9831(1) | 47(1) |
| Co(5) | 1835(1)  | 2326(1)  | 3119(1) | 41(1) |
| Co(6) | 4635(1)  | 8843(1)  | 4546(1) | 40(1) |
| S(1)  | 2665(2)  | 11336(2) | 942(1)  | 38(1) |
| S(2)  | 848(2)   | 10116(2) | 963(1)  | 39(1) |
| S(3)  | 2101(2)  | 8444(2)  | 1645(1) | 38(1) |
| S(4)  | 3886(2)  | 9712(2)  | 1648(1) | 35(1) |
| S(5)  | 2640(2)  | 11413(2) | 6278(2) | 39(1) |
| S(6)  | 1203(2)  | 9923(2)  | 5503(1) | 38(1) |
| S(7)  | 2498(2)  | 8306(2)  | 6200(1) | 37(1) |
| S(8)  | 3959(2)  | 9817(2)  | 6916(1) | 37(1) |
| Cl(1) | 2451(2)  | 13478(2) | 338(2)  | 58(1) |
| Cl(2) | -1149(2) | 10946(2) | 168(2)  | 51(1) |
| Cl(3) | 2400(2)  | 6240(2)  | 2134(2) | 52(1) |
| Cl(4) | 5939(2)  | 8845(2)  | 2242(2) | 47(1) |
| Cl(5) | 2184(2)  | 13648(2) | 6046(2) | 57(1) |
| Cl(6) | -676(2)  | 10664(2) | 4473(2) | 51(1) |
| Cl(7) | 2994(2)  | 6086(2)  | 6444(2) | 49(1) |
| Cl(8) | 5844(2)  | 9111(2)  | 7963(2) | 45(1) |
| C(1)  | 1555(7)  | 11833(8) | 602(5)  | 35(2) |
| C(2)  | 1449(8)  | 12771(8) | 334(6)  | 42(2) |
| C(3)  | 578(8)   | 13151(8) | 43(6)   | 43(2) |
| C(4)  | -223(8)  | 12584(9) | 5(6)    | 45(3) |
| C(5)  | -140(7)  | 11663(9) | 268(6)  | 42(2) |
| C(6)  | 734(7)   | 11263(8) | 594(5)  | 39(2) |
| C(7)  | 3221(7)  | 7959(8)  | 1967(5) | 34(2) |
| C(8)  | 3366(8)  | 7012(8)  | 2210(6) | 40(2) |
| C(9)  | 4258(8)  | 6648(8)  | 2481(5) | 42(2) |

|       |          |           |          |       |
|-------|----------|-----------|----------|-------|
| C(10) | 5044(8)  | 7226(8)   | 2500(6)  | 41(2) |
| C(11) | 4922(7)  | 8148(8)   | 2241(6)  | 38(2) |
| C(12) | 4031(7)  | 8548(7)   | 1971(5)  | 35(2) |
| C(13) | 1594(7)  | 11819(8)  | 5724(6)  | 38(2) |
| C(14) | 1385(8)  | 12790(8)  | 5611(7)  | 45(3) |
| C(15) | 586(8)   | 13099(9)  | 5160(6)  | 43(2) |
| C(16) | -44(8)   | 12445(8)  | 4798(6)  | 44(3) |
| C(17) | 134(8)   | 11478(9)  | 4929(6)  | 45(3) |
| C(18) | 946(7)   | 11136(8)  | 5379(5)  | 36(2) |
| C(19) | 3533(7)  | 7924(8)   | 6763(6)  | 38(2) |
| C(20) | 3751(8)  | 6956(8)   | 6889(6)  | 40(2) |
| C(21) | 4571(7)  | 6653(8)   | 7347(6)  | 41(2) |
| C(22) | 5208(7)  | 7324(9)   | 7678(6)  | 41(2) |
| C(23) | 5010(7)  | 8283(7)   | 7546(5)  | 36(2) |
| C(24) | 4188(7)  | 8604(7)   | 7092(5)  | 34(2) |
| C(25) | 2342(10) | 184(15)   | 9110(8)  | 79(5) |
| C(26) | 2611(9)  | -42(13)   | 8427(8)  | 69(4) |
| C(27) | 2006(10) | -770(12)  | 8103(7)  | 63(4) |
| C(28) | 1381(10) | -1007(13) | 8595(7)  | 66(4) |
| C(29) | 1591(11) | -408(13)  | 9217(7)  | 71(4) |
| C(30) | 19(11)   | 1129(13)  | 8381(8)  | 71(4) |
| C(31) | 757(12)  | 1765(13)  | 8341(10) | 84(5) |
| C(32) | 1101(13) | 1590(12)  | 7665(9)  | 78(4) |
| C(33) | 554(11)  | 850(12)   | 7297(8)  | 72(4) |
| C(34) | -122(10) | 556(13)   | 7742(8)  | 69(4) |
| C(35) | 4456(10) | 5501(11)  | 9492(7)  | 63(4) |
| C(36) | 3676(10) | 5441(10)  | 9859(8)  | 58(3) |
| C(37) | 3944(11) | 5793(11)  | 10580(8) | 65(4) |
| C(38) | 4915(10) | 6086(16)  | 10662(8) | 82(5) |
| C(39) | 5215(9)  | 5890(15)  | 9987(8)  | 83(6) |
| C(40) | 3302(13) | 7944(10)  | 10036(8) | 71(4) |
| C(41) | 4255(15) | 8232(12)  | 10067(9) | 88(6) |
| C(42) | 4512(14) | 8015(13)  | 9369(8)  | 84(5) |
| C(43) | 3717(10) | 7644(10)  | 8909(7)  | 58(3) |
| C(44) | 2967(11) | 7563(10)  | 9338(7)  | 61(3) |
| C(45) | 2397(9)  | 1629(9)   | 4073(6)  | 48(3) |



|               |          |          |          |         |
|---------------|----------|----------|----------|---------|
| <b>C(46)</b>  | 1614(9)  | 1102(9)  | 3663(6)  | 48(3)   |
| <b>C(47)</b>  | 1846(8)  | 887(9)   | 2969(6)  | 45(2)   |
| <b>C(48)</b>  | 2744(7)  | 1278(8)  | 2920(6)  | 40(2)   |
| <b>C(49)</b>  | 3080(8)  | 1743(8)  | 3601(6)  | 44(2)   |
| <b>C(50)</b>  | 1329(9)  | 3612(9)  | 3393(7)  | 53(3)   |
| <b>C(51)</b>  | 2071(9)  | 3747(9)  | 2973(6)  | 52(3)   |
| <b>C(52)</b>  | 1807(9)  | 3289(10) | 2282(6)  | 53(3)   |
| <b>C(53)</b>  | 895(9)   | 2863(10) | 2270(7)  | 52(3)   |
| <b>C(54)</b>  | 609(9)   | 3074(10) | 2960(7)  | 57(3)   |
| <b>C(55)</b>  | 4703(9)  | 7394(9)  | 4463(7)  | 53(3)   |
| <b>C(56)</b>  | 4445(10) | 7664(10) | 5144(8)  | 60(3)   |
| <b>C(57)</b>  | 5174(10) | 8244(11) | 5525(7)  | 61(4)   |
| <b>C(58)</b>  | 5884(9)  | 8345(10) | 5074(6)  | 54(3)   |
| <b>C(59)</b>  | 5599(9)  | 7812(9)  | 4419(7)  | 50(3)   |
| <b>C(60)</b>  | 3413(8)  | 9591(8)  | 4401(6)  | 43(2)   |
| <b>C(61)</b>  | 4153(8)  | 10133(9) | 4801(6)  | 46(3)   |
| <b>C(62)</b>  | 4876(8)  | 10249(8) | 4363(6)  | 42(2)   |
| <b>C(63)</b>  | 4566(8)  | 9764(8)  | 3688(6)  | 44(2)   |
| <b>C(64)</b>  | 3650(8)  | 9362(8)  | 3710(6)  | 43(2)   |
| <b>N(1)</b>   | 7016(11) | 387(11)  | 5693(8)  | 80(4)   |
| <b>C(65)</b>  | 7583(12) | 940(14)  | 5806(8)  | 78(4)   |
| <b>C(66)</b>  | 8401(16) | 1503(15) | 6152(14) | 70(6)   |
| <b>C(67)</b>  | 8132(16) | 2509(15) | 6139(15) | 117(7)  |
| <b>C(68)</b>  | 8911(12) | 3226(14) | 6429(9)  | 84(4)   |
| <b>C(66A)</b> | 8260(30) | 1680(20) | 5730(20) | 116(13) |
| <b>N(2)</b>   | 8790(40) | 1790(20) | 2100(20) | 138(19) |
| <b>C(69)</b>  | 8990(20) | 1040(20) | 2292(13) | 83(8)   |
| <b>C(70)</b>  | 9250(20) | 70(20)   | 2501(16) | 101(9)  |
| <b>C(71)</b>  | 8520(30) | -640(20) | 2360(20) | 124(13) |
| <b>C(72)</b>  | 8100(30) | -830(30) | 1580(20) | 117(13) |
| <b>N(2A)</b>  | 8790(30) | 1810(30) | 2130(30) | 80(20)  |
| <b>C(69A)</b> | 8430(30) | 1090(20) | 2110(20) | 61(11)  |
| <b>C(70A)</b> | 7940(30) | 170(20)  | 2070(20) | 73(11)  |
| <b>C(71A)</b> | 8510(30) | -600(30) | 1850(20) | 79(11)  |
| <b>C(72A)</b> | 9430(30) | -750(40) | 2360(30) | 93(16)  |

**Table S3:** Bond lengths [Å] and angles [deg] for [CoCp<sub>2</sub>]<sub>2</sub>[Co<sup>II</sup>(bdt)<sub>2</sub>].

---

|             |           |
|-------------|-----------|
| Co(1)-S(4)  | 2.178(3)  |
| Co(1)-S(3)  | 2.185(3)  |
| Co(1)-S(1)  | 2.185(3)  |
| Co(1)-S(2)  | 2.187(3)  |
| Co(2)-S(6)  | 2.177(3)  |
| Co(2)-S(5)  | 2.180(3)  |
| Co(2)-S(7)  | 2.183(3)  |
| Co(2)-S(8)  | 2.183(3)  |
| Co(3)-C(32) | 2.019(18) |
| Co(3)-C(33) | 2.025(15) |
| Co(3)-C(25) | 2.031(15) |
| Co(3)-C(31) | 2.038(18) |
| Co(3)-C(27) | 2.041(15) |
| Co(3)-C(34) | 2.043(15) |
| Co(3)-C(29) | 2.043(16) |
| Co(3)-C(30) | 2.044(16) |
| Co(3)-C(26) | 2.048(14) |
| Co(3)-C(28) | 2.051(18) |
| Co(4)-C(42) | 2.008(16) |
| Co(4)-C(44) | 2.025(15) |
| Co(4)-C(40) | 2.027(14) |
| Co(4)-C(36) | 2.031(14) |
| Co(4)-C(41) | 2.032(16) |
| Co(4)-C(37) | 2.032(15) |
| Co(4)-C(39) | 2.033(15) |
| Co(4)-C(38) | 2.036(15) |
| Co(4)-C(35) | 2.036(15) |
| Co(4)-C(43) | 2.055(14) |
| Co(5)-C(54) | 2.024(12) |
| Co(5)-C(49) | 2.028(11) |
| Co(5)-C(53) | 2.033(12) |
| Co(5)-C(48) | 2.036(11) |
| Co(5)-C(47) | 2.037(12) |
| Co(5)-C(50) | 2.037(12) |
| Co(5)-C(46) | 2.038(12) |
| Co(5)-C(51) | 2.045(13) |
| Co(5)-C(52) | 2.045(13) |
| Co(5)-C(45) | 2.055(11) |
| Co(6)-C(58) | 2.015(12) |
| Co(6)-C(61) | 2.018(11) |
| Co(6)-C(60) | 2.020(11) |
| Co(6)-C(57) | 2.023(12) |
| Co(6)-C(56) | 2.028(13) |
| Co(6)-C(63) | 2.031(11) |
| Co(6)-C(59) | 2.038(12) |
| Co(6)-C(62) | 2.039(11) |
| Co(6)-C(55) | 2.040(13) |
| Co(6)-C(64) | 2.044(11) |

|             |           |
|-------------|-----------|
| S(1)-C(1)   | 1.754(10) |
| S(2)-C(6)   | 1.743(12) |
| S(3)-C(7)   | 1.753(10) |
| S(4)-C(12)  | 1.738(11) |
| S(5)-C(13)  | 1.762(11) |
| S(6)-C(18)  | 1.747(11) |
| S(7)-C(19)  | 1.747(11) |
| S(8)-C(24)  | 1.751(11) |
| Cl(1)-C(2)  | 1.742(12) |
| Cl(2)-C(5)  | 1.745(11) |
| Cl(3)-C(8)  | 1.744(11) |
| Cl(4)-C(11) | 1.754(11) |
| Cl(5)-C(14) | 1.759(12) |
| Cl(6)-C(17) | 1.742(12) |
| Cl(7)-C(20) | 1.745(11) |
| Cl(8)-C(23) | 1.750(10) |
| C(1)-C(2)   | 1.404(16) |
| C(1)-C(6)   | 1.419(15) |
| C(2)-C(3)   | 1.381(16) |
| C(3)-C(4)   | 1.389(17) |
| C(3)-H(3)   | 0.9500    |
| C(4)-C(5)   | 1.376(18) |
| C(4)-H(4)   | 0.9500    |
| C(5)-C(6)   | 1.413(15) |
| C(7)-C(8)   | 1.406(15) |
| C(7)-C(12)  | 1.422(14) |
| C(8)-C(9)   | 1.390(16) |
| C(9)-C(10)  | 1.382(16) |
| C(9)-H(9)   | 0.9500    |
| C(10)-C(11) | 1.378(16) |
| C(10)-H(10) | 0.9500    |
| C(11)-C(12) | 1.408(15) |
| C(13)-C(14) | 1.402(16) |
| C(13)-C(18) | 1.410(15) |
| C(14)-C(15) | 1.368(16) |
| C(15)-C(16) | 1.379(17) |
| C(15)-H(15) | 0.9500    |
| C(16)-C(17) | 1.393(17) |
| C(16)-H(16) | 0.9500    |
| C(17)-C(18) | 1.396(15) |
| C(19)-C(20) | 1.403(15) |
| C(19)-C(24) | 1.404(15) |
| C(20)-C(21) | 1.394(15) |
| C(21)-C(22) | 1.380(16) |
| C(21)-H(21) | 0.9500    |
| C(22)-C(23) | 1.387(16) |
| C(22)-H(22) | 0.9500    |
| C(23)-C(24) | 1.402(14) |
| C(25)-C(29) | 1.40(2)   |
| C(25)-C(26) | 1.412(19) |
| C(25)-H(25) | 0.9500    |
| C(26)-C(27) | 1.41(2)   |
| C(26)-H(26) | 0.9500    |

|             |           |
|-------------|-----------|
| C(27)-C(28) | 1.414(19) |
| C(27)-H(27) | 0.9500    |
| C(28)-C(29) | 1.41(2)   |
| C(28)-H(28) | 0.9500    |
| C(29)-H(29) | 0.9500    |
| C(30)-C(31) | 1.39(2)   |
| C(30)-C(34) | 1.411(19) |
| C(30)-H(30) | 0.9500    |
| C(31)-C(32) | 1.43(2)   |
| C(31)-H(31) | 0.9500    |
| C(32)-C(33) | 1.41(2)   |
| C(32)-H(32) | 0.9500    |
| C(33)-C(34) | 1.43(2)   |
| C(33)-H(33) | 0.9500    |
| C(34)-H(34) | 0.9500    |
| C(35)-C(36) | 1.400(19) |
| C(35)-C(39) | 1.41(2)   |
| C(35)-H(35) | 0.9500    |
| C(36)-C(37) | 1.41(2)   |
| C(36)-H(36) | 0.9500    |
| C(37)-C(38) | 1.43(2)   |
| C(37)-H(37) | 0.9500    |
| C(38)-C(39) | 1.41(2)   |
| C(38)-H(38) | 0.9500    |
| C(39)-H(39) | 0.9500    |
| C(40)-C(44) | 1.40(2)   |
| C(40)-C(41) | 1.41(3)   |
| C(40)-H(40) | 0.9500    |
| C(41)-C(42) | 1.43(2)   |
| C(41)-H(41) | 0.9500    |
| C(42)-C(43) | 1.40(2)   |
| C(42)-H(42) | 0.9500    |
| C(43)-C(44) | 1.438(19) |
| C(43)-H(43) | 0.9500    |
| C(44)-H(44) | 0.9500    |
| C(45)-C(49) | 1.420(17) |
| C(45)-C(46) | 1.447(18) |
| C(45)-H(45) | 0.9500    |
| C(46)-C(47) | 1.405(16) |
| C(46)-H(46) | 0.9500    |
| C(47)-C(48) | 1.415(15) |
| C(47)-H(47) | 0.9500    |
| C(48)-C(49) | 1.425(15) |
| C(48)-H(48) | 0.9500    |
| C(49)-H(49) | 0.9500    |
| C(50)-C(54) | 1.41(2)   |
| C(50)-C(51) | 1.427(18) |
| C(50)-H(50) | 0.9500    |
| C(51)-C(52) | 1.420(17) |
| C(51)-H(51) | 0.9500    |
| C(52)-C(53) | 1.433(18) |
| C(52)-H(52) | 0.9500    |
| C(53)-C(54) | 1.428(18) |

|               |           |
|---------------|-----------|
| C(53)-H(53)   | 0.9500    |
| C(54)-H(54)   | 0.9500    |
| C(55)-C(56)   | 1.416(19) |
| C(55)-C(59)   | 1.424(18) |
| C(55)-H(55)   | 0.9500    |
| C(56)-C(57)   | 1.42(2)   |
| C(56)-H(56)   | 0.9500    |
| C(57)-C(58)   | 1.422(18) |
| C(57)-H(57)   | 0.9500    |
| C(58)-C(59)   | 1.421(18) |
| C(58)-H(58)   | 0.9500    |
| C(59)-H(59)   | 0.9500    |
| C(60)-C(64)   | 1.407(16) |
| C(60)-C(61)   | 1.410(17) |
| C(60)-H(60)   | 0.9500    |
| C(61)-C(62)   | 1.423(16) |
| C(61)-H(61)   | 0.9500    |
| C(62)-C(63)   | 1.422(16) |
| C(62)-H(62)   | 0.9500    |
| C(63)-C(64)   | 1.434(16) |
| C(63)-H(63)   | 0.9500    |
| C(64)-H(64)   | 0.9500    |
| N(1)-C(65)    | 1.116(19) |
| C(65)-C(66A)  | 1.44(2)   |
| C(65)-C(66)   | 1.47(2)   |
| C(66)-C(67)   | 1.46(2)   |
| C(66)-H(66B)  | 0.9900    |
| C(66)-H(66A)  | 0.9900    |
| C(67)-C(66A)  | 1.41(2)   |
| C(67)-C(68)   | 1.53(3)   |
| C(67)-H(67A)  | 0.9900    |
| C(67)-H(67B)  | 0.9900    |
| C(67)-H(67C)  | 0.9900    |
| C(67)-H(67D)  | 0.9900    |
| C(68)-H(68A)  | 0.9800    |
| C(68)-H(68B)  | 0.9800    |
| C(68)-H(68C)  | 0.9800    |
| C(66A)-H(66C) | 0.9900    |
| C(66A)-H(66D) | 0.9900    |
| N(2)-C(69)    | 1.13(3)   |
| C(69)-C(70)   | 1.44(2)   |
| C(70)-C(71)   | 1.44(2)   |
| C(70)-H(70A)  | 0.9900    |
| C(70)-H(70B)  | 0.9900    |
| C(71)-C(72)   | 1.49(3)   |
| C(71)-H(71A)  | 0.9900    |
| C(71)-H(71B)  | 0.9900    |
| C(72)-H(72A)  | 0.9800    |
| C(72)-H(72B)  | 0.9800    |
| C(72)-H(72C)  | 0.9800    |
| N(2A)-C(69A)  | 1.13(3)   |
| C(69A)-C(70A) | 1.46(2)   |
| C(70A)-C(71A) | 1.45(2)   |

|                   |            |
|-------------------|------------|
| C(70A)-H(70C)     | 0.9900     |
| C(70A)-H(70D)     | 0.9900     |
| C(71A)-C(72A)     | 1.51(3)    |
| C(71A)-H(71C)     | 0.9900     |
| C(71A)-H(71D)     | 0.9900     |
| C(72A)-H(72D)     | 0.9800     |
| C(72A)-H(72E)     | 0.9800     |
| C(72A)-H(72F)     | 0.9800     |
|                   |            |
| S(4)-Co(1)-S(3)   | 91.08(11)  |
| S(4)-Co(1)-S(1)   | 87.94(11)  |
| S(3)-Co(1)-S(1)   | 178.95(12) |
| S(4)-Co(1)-S(2)   | 178.08(14) |
| S(3)-Co(1)-S(2)   | 89.94(11)  |
| S(1)-Co(1)-S(2)   | 91.04(11)  |
| S(6)-Co(2)-S(5)   | 91.08(11)  |
| S(6)-Co(2)-S(7)   | 89.63(11)  |
| S(5)-Co(2)-S(7)   | 177.97(13) |
| S(6)-Co(2)-S(8)   | 178.65(13) |
| S(5)-Co(2)-S(8)   | 88.30(11)  |
| S(7)-Co(2)-S(8)   | 91.03(11)  |
| C(32)-Co(3)-C(33) | 40.7(7)    |
| C(32)-Co(3)-C(25) | 122.3(8)   |
| C(33)-Co(3)-C(25) | 156.8(7)   |
| C(32)-Co(3)-C(31) | 41.4(6)    |
| C(33)-Co(3)-C(31) | 68.7(7)    |
| C(25)-Co(3)-C(31) | 109.3(8)   |
| C(32)-Co(3)-C(27) | 124.7(6)   |
| C(33)-Co(3)-C(27) | 106.9(5)   |
| C(25)-Co(3)-C(27) | 67.9(6)    |
| C(31)-Co(3)-C(27) | 163.1(6)   |
| C(32)-Co(3)-C(34) | 68.8(8)    |
| C(33)-Co(3)-C(34) | 41.2(6)    |
| C(25)-Co(3)-C(34) | 161.4(6)   |
| C(31)-Co(3)-C(34) | 68.0(7)    |
| C(27)-Co(3)-C(34) | 120.1(6)   |
| C(32)-Co(3)-C(29) | 157.1(7)   |
| C(33)-Co(3)-C(29) | 161.0(7)   |
| C(25)-Co(3)-C(29) | 40.1(7)    |
| C(31)-Co(3)-C(29) | 121.4(7)   |
| C(27)-Co(3)-C(29) | 68.1(5)    |
| C(34)-Co(3)-C(29) | 124.2(7)   |
| C(32)-Co(3)-C(30) | 68.5(7)    |
| C(33)-Co(3)-C(30) | 68.4(6)    |
| C(25)-Co(3)-C(30) | 125.8(6)   |
| C(31)-Co(3)-C(30) | 39.9(7)    |
| C(27)-Co(3)-C(30) | 155.3(7)   |
| C(34)-Co(3)-C(30) | 40.4(5)    |
| C(29)-Co(3)-C(30) | 108.0(6)   |
| C(32)-Co(3)-C(26) | 108.4(7)   |
| C(33)-Co(3)-C(26) | 120.9(6)   |
| C(25)-Co(3)-C(26) | 40.5(6)    |
| C(31)-Co(3)-C(26) | 126.8(7)   |

|                   |          |
|-------------------|----------|
| C(27)-Co(3)-C(26) | 40.2(6)  |
| C(34)-Co(3)-C(26) | 155.7(5) |
| C(29)-Co(3)-C(26) | 67.9(6)  |
| C(30)-Co(3)-C(26) | 163.0(6) |
| C(32)-Co(3)-C(28) | 161.2(6) |
| C(33)-Co(3)-C(28) | 124.1(6) |
| C(25)-Co(3)-C(28) | 67.6(7)  |
| C(31)-Co(3)-C(28) | 155.6(6) |
| C(27)-Co(3)-C(28) | 40.4(5)  |
| C(34)-Co(3)-C(28) | 106.7(7) |
| C(29)-Co(3)-C(28) | 40.3(6)  |
| C(30)-Co(3)-C(28) | 120.7(6) |
| C(26)-Co(3)-C(28) | 67.7(6)  |
| C(42)-Co(4)-C(44) | 69.3(7)  |
| C(42)-Co(4)-C(40) | 68.9(7)  |
| C(44)-Co(4)-C(40) | 40.4(6)  |
| C(42)-Co(4)-C(36) | 156.2(6) |
| C(44)-Co(4)-C(36) | 105.8(6) |
| C(40)-Co(4)-C(36) | 123.3(6) |
| C(42)-Co(4)-C(41) | 41.4(6)  |
| C(44)-Co(4)-C(41) | 68.9(8)  |
| C(40)-Co(4)-C(41) | 40.8(8)  |
| C(36)-Co(4)-C(41) | 160.5(6) |
| C(42)-Co(4)-C(37) | 162.2(7) |
| C(44)-Co(4)-C(37) | 119.5(6) |
| C(40)-Co(4)-C(37) | 106.9(5) |
| C(36)-Co(4)-C(37) | 40.6(6)  |
| C(41)-Co(4)-C(37) | 124.3(6) |
| C(42)-Co(4)-C(39) | 108.9(8) |
| C(44)-Co(4)-C(39) | 161.1(6) |
| C(40)-Co(4)-C(39) | 157.9(7) |
| C(36)-Co(4)-C(39) | 67.8(7)  |
| C(41)-Co(4)-C(39) | 123.0(9) |
| C(37)-Co(4)-C(39) | 68.1(7)  |
| C(42)-Co(4)-C(38) | 125.0(8) |
| C(44)-Co(4)-C(38) | 155.9(5) |
| C(40)-Co(4)-C(38) | 121.5(6) |
| C(36)-Co(4)-C(38) | 68.9(7)  |
| C(41)-Co(4)-C(38) | 107.8(8) |
| C(37)-Co(4)-C(38) | 41.3(7)  |
| C(39)-Co(4)-C(38) | 40.5(6)  |
| C(42)-Co(4)-C(35) | 121.7(6) |
| C(44)-Co(4)-C(35) | 123.3(6) |
| C(40)-Co(4)-C(35) | 159.7(7) |
| C(36)-Co(4)-C(35) | 40.3(6)  |
| C(41)-Co(4)-C(35) | 158.2(7) |
| C(37)-Co(4)-C(35) | 68.2(6)  |
| C(39)-Co(4)-C(35) | 40.5(6)  |
| C(38)-Co(4)-C(35) | 68.7(7)  |
| C(42)-Co(4)-C(43) | 40.4(6)  |
| C(44)-Co(4)-C(43) | 41.3(5)  |
| C(40)-Co(4)-C(43) | 68.2(5)  |
| C(36)-Co(4)-C(43) | 120.8(6) |

|                   |          |
|-------------------|----------|
| C(41)-Co(4)-C(43) | 68.4(6)  |
| C(37)-Co(4)-C(43) | 155.8(6) |
| C(39)-Co(4)-C(43) | 125.3(6) |
| C(38)-Co(4)-C(43) | 161.6(6) |
| C(35)-Co(4)-C(43) | 107.7(5) |
| C(54)-Co(5)-C(49) | 162.0(5) |
| C(54)-Co(5)-C(53) | 41.2(5)  |
| C(49)-Co(5)-C(53) | 155.4(5) |
| C(54)-Co(5)-C(48) | 155.9(5) |
| C(49)-Co(5)-C(48) | 41.1(4)  |
| C(53)-Co(5)-C(48) | 119.4(5) |
| C(54)-Co(5)-C(47) | 121.2(6) |
| C(49)-Co(5)-C(47) | 68.6(5)  |
| C(53)-Co(5)-C(47) | 106.3(5) |
| C(48)-Co(5)-C(47) | 40.7(4)  |
| C(54)-Co(5)-C(50) | 40.8(6)  |
| C(49)-Co(5)-C(50) | 124.8(5) |
| C(53)-Co(5)-C(50) | 69.2(5)  |
| C(48)-Co(5)-C(50) | 161.3(5) |
| C(47)-Co(5)-C(50) | 157.1(5) |
| C(54)-Co(5)-C(46) | 107.8(5) |
| C(49)-Co(5)-C(46) | 69.0(5)  |
| C(53)-Co(5)-C(46) | 123.6(5) |
| C(48)-Co(5)-C(46) | 68.7(4)  |
| C(47)-Co(5)-C(46) | 40.3(5)  |
| C(50)-Co(5)-C(46) | 122.2(5) |
| C(54)-Co(5)-C(51) | 68.6(6)  |
| C(49)-Co(5)-C(51) | 107.3(5) |
| C(53)-Co(5)-C(51) | 69.0(5)  |
| C(48)-Co(5)-C(51) | 123.7(5) |
| C(47)-Co(5)-C(51) | 160.3(5) |
| C(50)-Co(5)-C(51) | 40.9(5)  |
| C(46)-Co(5)-C(51) | 158.0(5) |
| C(54)-Co(5)-C(52) | 68.9(5)  |
| C(49)-Co(5)-C(52) | 120.2(5) |
| C(53)-Co(5)-C(52) | 41.2(5)  |
| C(48)-Co(5)-C(52) | 105.9(5) |
| C(47)-Co(5)-C(52) | 123.4(5) |
| C(50)-Co(5)-C(52) | 68.8(5)  |
| C(46)-Co(5)-C(52) | 160.2(5) |
| C(51)-Co(5)-C(52) | 40.6(5)  |
| C(54)-Co(5)-C(45) | 125.3(5) |
| C(49)-Co(5)-C(45) | 40.7(5)  |
| C(53)-Co(5)-C(45) | 161.8(5) |
| C(48)-Co(5)-C(45) | 68.8(4)  |
| C(47)-Co(5)-C(45) | 68.5(5)  |
| C(50)-Co(5)-C(45) | 108.3(5) |
| C(46)-Co(5)-C(45) | 41.4(5)  |
| C(51)-Co(5)-C(45) | 121.7(5) |
| C(52)-Co(5)-C(45) | 156.2(5) |
| C(58)-Co(6)-C(61) | 120.6(5) |
| C(58)-Co(6)-C(60) | 157.7(5) |
| C(61)-Co(6)-C(60) | 40.9(5)  |



|                   |          |
|-------------------|----------|
| C(58)-Co(6)-C(57) | 41.3(5)  |
| C(61)-Co(6)-C(57) | 105.1(5) |
| C(60)-Co(6)-C(57) | 121.9(5) |
| C(58)-Co(6)-C(56) | 69.1(6)  |
| C(61)-Co(6)-C(56) | 121.5(5) |
| C(60)-Co(6)-C(56) | 107.7(5) |
| C(57)-Co(6)-C(56) | 40.9(6)  |
| C(58)-Co(6)-C(63) | 121.4(5) |
| C(61)-Co(6)-C(63) | 68.7(4)  |
| C(60)-Co(6)-C(63) | 68.7(5)  |
| C(57)-Co(6)-C(63) | 156.9(6) |
| C(56)-Co(6)-C(63) | 161.2(6) |
| C(58)-Co(6)-C(59) | 41.0(5)  |
| C(61)-Co(6)-C(59) | 157.8(5) |
| C(60)-Co(6)-C(59) | 160.2(5) |
| C(57)-Co(6)-C(59) | 69.0(5)  |
| C(56)-Co(6)-C(59) | 68.8(5)  |
| C(63)-Co(6)-C(59) | 108.0(5) |
| C(58)-Co(6)-C(62) | 104.7(5) |
| C(61)-Co(6)-C(62) | 41.1(5)  |
| C(60)-Co(6)-C(62) | 69.1(5)  |
| C(57)-Co(6)-C(62) | 119.9(6) |
| C(56)-Co(6)-C(62) | 156.8(5) |
| C(63)-Co(6)-C(62) | 40.9(4)  |
| C(59)-Co(6)-C(62) | 122.0(5) |
| C(58)-Co(6)-C(55) | 69.0(6)  |
| C(61)-Co(6)-C(55) | 158.7(5) |
| C(60)-Co(6)-C(55) | 123.9(5) |
| C(57)-Co(6)-C(55) | 68.8(6)  |
| C(56)-Co(6)-C(55) | 40.7(5)  |
| C(63)-Co(6)-C(55) | 124.8(5) |
| C(59)-Co(6)-C(55) | 40.9(5)  |
| C(62)-Co(6)-C(55) | 159.8(5) |
| C(58)-Co(6)-C(64) | 159.2(5) |
| C(61)-Co(6)-C(64) | 68.6(4)  |
| C(60)-Co(6)-C(64) | 40.5(4)  |
| C(57)-Co(6)-C(64) | 159.1(5) |
| C(56)-Co(6)-C(64) | 124.1(6) |
| C(63)-Co(6)-C(64) | 41.2(4)  |
| C(59)-Co(6)-C(64) | 124.2(5) |
| C(62)-Co(6)-C(64) | 69.2(4)  |
| C(55)-Co(6)-C(64) | 109.5(5) |
| C(1)-S(1)-Co(1)   | 105.4(4) |
| C(6)-S(2)-Co(1)   | 105.4(4) |
| C(7)-S(3)-Co(1)   | 105.3(4) |
| C(12)-S(4)-Co(1)  | 105.6(4) |
| C(13)-S(5)-Co(2)  | 105.5(4) |
| C(18)-S(6)-Co(2)  | 105.5(3) |
| C(19)-S(7)-Co(2)  | 105.2(4) |
| C(24)-S(8)-Co(2)  | 105.1(3) |
| C(2)-C(1)-C(6)    | 118.8(9) |
| C(2)-C(1)-S(1)    | 122.5(8) |
| C(6)-C(1)-S(1)    | 118.7(8) |

|                   |           |
|-------------------|-----------|
| C(3)-C(2)-C(1)    | 122.4(10) |
| C(3)-C(2)-Cl(1)   | 118.3(9)  |
| C(1)-C(2)-Cl(1)   | 119.3(8)  |
| C(2)-C(3)-C(4)    | 119.1(11) |
| C(2)-C(3)-H(3)    | 120.5     |
| C(4)-C(3)-H(3)    | 120.5     |
| C(5)-C(4)-C(3)    | 119.7(10) |
| C(5)-C(4)-H(4)    | 120.1     |
| C(3)-C(4)-H(4)    | 120.1     |
| C(4)-C(5)-C(6)    | 122.8(11) |
| C(4)-C(5)-Cl(2)   | 118.7(8)  |
| C(6)-C(5)-Cl(2)   | 118.5(9)  |
| C(5)-C(6)-C(1)    | 117.1(10) |
| C(5)-C(6)-S(2)    | 123.5(9)  |
| C(1)-C(6)-S(2)    | 119.4(8)  |
| C(8)-C(7)-C(12)   | 117.9(9)  |
| C(8)-C(7)-S(3)    | 123.5(8)  |
| C(12)-C(7)-S(3)   | 118.5(8)  |
| C(9)-C(8)-C(7)    | 122.7(10) |
| C(9)-C(8)-Cl(3)   | 118.1(8)  |
| C(7)-C(8)-Cl(3)   | 119.1(8)  |
| C(10)-C(9)-C(8)   | 119.4(10) |
| C(10)-C(9)-H(9)   | 120.3     |
| C(8)-C(9)-H(9)    | 120.3     |
| C(11)-C(10)-C(9)  | 119.0(10) |
| C(11)-C(10)-H(10) | 120.5     |
| C(9)-C(10)-H(10)  | 120.5     |
| C(10)-C(11)-C(12) | 123.4(10) |
| C(10)-C(11)-Cl(4) | 117.6(8)  |
| C(12)-C(11)-Cl(4) | 118.9(8)  |
| C(11)-C(12)-C(7)  | 117.5(9)  |
| C(11)-C(12)-S(4)  | 123.0(8)  |
| C(7)-C(12)-S(4)   | 119.5(8)  |
| C(14)-C(13)-C(18) | 118.9(10) |
| C(14)-C(13)-S(5)  | 122.7(9)  |
| C(18)-C(13)-S(5)  | 118.5(8)  |
| C(15)-C(14)-C(13) | 122.3(11) |
| C(15)-C(14)-Cl(5) | 118.5(9)  |
| C(13)-C(14)-Cl(5) | 119.2(9)  |
| C(14)-C(15)-C(16) | 119.9(11) |
| C(14)-C(15)-H(15) | 120.0     |
| C(16)-C(15)-H(15) | 120.0     |
| C(15)-C(16)-C(17) | 118.4(10) |
| C(15)-C(16)-H(16) | 120.8     |
| C(17)-C(16)-H(16) | 120.8     |
| C(16)-C(17)-C(18) | 123.2(11) |
| C(16)-C(17)-Cl(6) | 117.8(9)  |
| C(18)-C(17)-Cl(6) | 119.0(9)  |
| C(17)-C(18)-C(13) | 117.2(10) |
| C(17)-C(18)-S(6)  | 123.3(9)  |
| C(13)-C(18)-S(6)  | 119.5(8)  |
| C(20)-C(19)-C(24) | 118.1(9)  |
| C(20)-C(19)-S(7)  | 122.6(9)  |

|                   |           |
|-------------------|-----------|
| C(24)-C(19)-S(7)  | 119.3(8)  |
| C(21)-C(20)-C(19) | 122.4(10) |
| C(21)-C(20)-Cl(7) | 118.0(8)  |
| C(19)-C(20)-Cl(7) | 119.6(8)  |
| C(22)-C(21)-C(20) | 119.4(10) |
| C(22)-C(21)-H(21) | 120.3     |
| C(20)-C(21)-H(21) | 120.3     |
| C(21)-C(22)-C(23) | 118.8(10) |
| C(21)-C(22)-H(22) | 120.6     |
| C(23)-C(22)-H(22) | 120.6     |
| C(22)-C(23)-C(24) | 122.9(10) |
| C(22)-C(23)-Cl(8) | 117.5(8)  |
| C(24)-C(23)-Cl(8) | 119.6(8)  |
| C(23)-C(24)-C(19) | 118.4(9)  |
| C(23)-C(24)-S(8)  | 122.4(8)  |
| C(19)-C(24)-S(8)  | 119.2(8)  |
| C(29)-C(25)-C(26) | 108.8(14) |
| C(29)-C(25)-Co(3) | 70.4(9)   |
| C(26)-C(25)-Co(3) | 70.4(8)   |
| C(29)-C(25)-H(25) | 125.6     |
| C(26)-C(25)-H(25) | 125.6     |
| Co(3)-C(25)-H(25) | 125.1     |
| C(27)-C(26)-C(25) | 107.5(12) |
| C(27)-C(26)-Co(3) | 69.6(8)   |
| C(25)-C(26)-Co(3) | 69.1(8)   |
| C(27)-C(26)-H(26) | 126.2     |
| C(25)-C(26)-H(26) | 126.2     |
| Co(3)-C(26)-H(26) | 126.6     |
| C(26)-C(27)-C(28) | 108.0(12) |
| C(26)-C(27)-Co(3) | 70.2(9)   |
| C(28)-C(27)-Co(3) | 70.1(9)   |
| C(26)-C(27)-H(27) | 126.0     |
| C(28)-C(27)-H(27) | 126.0     |
| Co(3)-C(27)-H(27) | 125.3     |
| C(29)-C(28)-C(27) | 107.9(14) |
| C(29)-C(28)-Co(3) | 69.5(10)  |
| C(27)-C(28)-Co(3) | 69.4(10)  |
| C(29)-C(28)-H(28) | 126.0     |
| C(27)-C(28)-H(28) | 126.0     |
| Co(3)-C(28)-H(28) | 126.6     |
| C(25)-C(29)-C(28) | 107.7(12) |
| C(25)-C(29)-Co(3) | 69.4(10)  |
| C(28)-C(29)-Co(3) | 70.1(9)   |
| C(25)-C(29)-H(29) | 126.1     |
| C(28)-C(29)-H(29) | 126.1     |
| Co(3)-C(29)-H(29) | 125.9     |
| C(31)-C(30)-C(34) | 109.0(13) |
| C(31)-C(30)-Co(3) | 69.8(9)   |
| C(34)-C(30)-Co(3) | 69.8(8)   |
| C(31)-C(30)-H(30) | 125.5     |
| C(34)-C(30)-H(30) | 125.5     |
| Co(3)-C(30)-H(30) | 126.5     |
| C(30)-C(31)-C(32) | 108.0(14) |

|                   |           |
|-------------------|-----------|
| C(30)-C(31)-Co(3) | 70.3(10)  |
| C(32)-C(31)-Co(3) | 68.6(9)   |
| C(30)-C(31)-H(31) | 126.0     |
| C(32)-C(31)-H(31) | 126.0     |
| Co(3)-C(31)-H(31) | 126.7     |
| C(33)-C(32)-C(31) | 107.5(15) |
| C(33)-C(32)-Co(3) | 69.9(10)  |
| C(31)-C(32)-Co(3) | 70.0(11)  |
| C(33)-C(32)-H(32) | 126.2     |
| C(31)-C(32)-H(32) | 126.2     |
| Co(3)-C(32)-H(32) | 125.5     |
| C(32)-C(33)-C(34) | 108.2(13) |
| C(32)-C(33)-Co(3) | 69.5(10)  |
| C(34)-C(33)-Co(3) | 70.1(9)   |
| C(32)-C(33)-H(33) | 125.9     |
| C(34)-C(33)-H(33) | 125.9     |
| Co(3)-C(33)-H(33) | 126.1     |
| C(30)-C(34)-C(33) | 107.3(15) |
| C(30)-C(34)-Co(3) | 69.8(9)   |
| C(33)-C(34)-Co(3) | 68.7(9)   |
| C(30)-C(34)-H(34) | 126.4     |
| C(33)-C(34)-H(34) | 126.4     |
| Co(3)-C(34)-H(34) | 126.6     |
| C(36)-C(35)-C(39) | 107.7(12) |
| C(36)-C(35)-Co(4) | 69.7(8)   |
| C(39)-C(35)-Co(4) | 69.6(9)   |
| C(36)-C(35)-H(35) | 126.2     |
| C(39)-C(35)-H(35) | 126.2     |
| Co(4)-C(35)-H(35) | 126.1     |
| C(35)-C(36)-C(37) | 108.5(13) |
| C(35)-C(36)-Co(4) | 70.1(9)   |
| C(37)-C(36)-Co(4) | 69.7(8)   |
| C(35)-C(36)-H(36) | 125.7     |
| C(37)-C(36)-H(36) | 125.7     |
| Co(4)-C(36)-H(36) | 126.0     |
| C(36)-C(37)-C(38) | 108.0(12) |
| C(36)-C(37)-Co(4) | 69.6(8)   |
| C(38)-C(37)-Co(4) | 69.5(9)   |
| C(36)-C(37)-H(37) | 126.0     |
| C(38)-C(37)-H(37) | 126.0     |
| Co(4)-C(37)-H(37) | 126.4     |
| C(39)-C(38)-C(37) | 106.4(14) |
| C(39)-C(38)-Co(4) | 69.6(9)   |
| C(37)-C(38)-Co(4) | 69.2(8)   |
| C(39)-C(38)-H(38) | 126.8     |
| C(37)-C(38)-H(38) | 126.8     |
| Co(4)-C(38)-H(38) | 125.9     |
| C(35)-C(39)-C(38) | 109.4(13) |
| C(35)-C(39)-Co(4) | 69.9(8)   |
| C(38)-C(39)-Co(4) | 69.9(9)   |
| C(35)-C(39)-H(39) | 125.3     |
| C(38)-C(39)-H(39) | 125.3     |
| Co(4)-C(39)-H(39) | 126.5     |

|                   |           |
|-------------------|-----------|
| C(44)-C(40)-C(41) | 109.2(12) |
| C(44)-C(40)-Co(4) | 69.7(8)   |
| C(41)-C(40)-Co(4) | 69.8(10)  |
| C(44)-C(40)-H(40) | 125.4     |
| C(41)-C(40)-H(40) | 125.4     |
| Co(4)-C(40)-H(40) | 126.7     |
| C(40)-C(41)-C(42) | 107.0(14) |
| C(40)-C(41)-Co(4) | 69.4(8)   |
| C(42)-C(41)-Co(4) | 68.4(9)   |
| C(40)-C(41)-H(41) | 126.5     |
| C(42)-C(41)-H(41) | 126.5     |
| Co(4)-C(41)-H(41) | 127.2     |
| C(43)-C(42)-C(41) | 108.6(15) |
| C(43)-C(42)-Co(4) | 71.6(8)   |
| C(41)-C(42)-Co(4) | 70.2(9)   |
| C(43)-C(42)-H(42) | 125.7     |
| C(41)-C(42)-H(42) | 125.7     |
| Co(4)-C(42)-H(42) | 124.0     |
| C(42)-C(43)-C(44) | 107.6(12) |
| C(42)-C(43)-Co(4) | 68.0(9)   |
| C(44)-C(43)-Co(4) | 68.3(8)   |
| C(42)-C(43)-H(43) | 126.2     |
| C(44)-C(43)-H(43) | 126.2     |
| Co(4)-C(43)-H(43) | 129.1     |
| C(40)-C(44)-C(43) | 107.4(14) |
| C(40)-C(44)-Co(4) | 69.9(9)   |
| C(43)-C(44)-Co(4) | 70.5(8)   |
| C(40)-C(44)-H(44) | 126.3     |
| C(43)-C(44)-H(44) | 126.3     |
| Co(4)-C(44)-H(44) | 125.0     |
| C(49)-C(45)-C(46) | 106.9(9)  |
| C(49)-C(45)-Co(5) | 68.6(6)   |
| C(46)-C(45)-Co(5) | 68.7(7)   |
| C(49)-C(45)-H(45) | 126.5     |
| C(46)-C(45)-H(45) | 126.5     |
| Co(5)-C(45)-H(45) | 127.7     |
| C(47)-C(46)-C(45) | 107.7(10) |
| C(47)-C(46)-Co(5) | 69.8(7)   |
| C(45)-C(46)-Co(5) | 69.9(7)   |
| C(47)-C(46)-H(46) | 126.1     |
| C(45)-C(46)-H(46) | 126.1     |
| Co(5)-C(46)-H(46) | 125.8     |
| C(46)-C(47)-C(48) | 109.2(10) |
| C(46)-C(47)-Co(5) | 69.9(7)   |
| C(48)-C(47)-Co(5) | 69.6(7)   |
| C(46)-C(47)-H(47) | 125.4     |
| C(48)-C(47)-H(47) | 125.4     |
| Co(5)-C(47)-H(47) | 126.6     |
| C(47)-C(48)-C(49) | 107.5(9)  |
| C(47)-C(48)-Co(5) | 69.7(6)   |
| C(49)-C(48)-Co(5) | 69.2(6)   |
| C(47)-C(48)-H(48) | 126.3     |
| C(49)-C(48)-H(48) | 126.3     |

|                   |           |
|-------------------|-----------|
| Co(5)-C(48)-H(48) | 126.4     |
| C(45)-C(49)-C(48) | 108.7(10) |
| C(45)-C(49)-Co(5) | 70.7(6)   |
| C(48)-C(49)-Co(5) | 69.8(6)   |
| C(45)-C(49)-H(49) | 125.7     |
| C(48)-C(49)-H(49) | 125.7     |
| Co(5)-C(49)-H(49) | 125.5     |
| C(54)-C(50)-C(51) | 107.7(11) |
| C(54)-C(50)-Co(5) | 69.1(7)   |
| C(51)-C(50)-Co(5) | 69.8(7)   |
| C(54)-C(50)-H(50) | 126.2     |
| C(51)-C(50)-H(50) | 126.2     |
| Co(5)-C(50)-H(50) | 126.4     |
| C(52)-C(51)-C(50) | 108.3(11) |
| C(52)-C(51)-Co(5) | 69.7(7)   |
| C(50)-C(51)-Co(5) | 69.3(7)   |
| C(52)-C(51)-H(51) | 125.9     |
| C(50)-C(51)-H(51) | 125.9     |
| Co(5)-C(51)-H(51) | 126.8     |
| C(51)-C(52)-C(53) | 108.1(11) |
| C(51)-C(52)-Co(5) | 69.7(7)   |
| C(53)-C(52)-Co(5) | 69.0(7)   |
| C(51)-C(52)-H(52) | 126.0     |
| C(53)-C(52)-H(52) | 126.0     |
| Co(5)-C(52)-H(52) | 127.0     |
| C(54)-C(53)-C(52) | 107.1(11) |
| C(54)-C(53)-Co(5) | 69.1(7)   |
| C(52)-C(53)-Co(5) | 69.9(7)   |
| C(54)-C(53)-H(53) | 126.5     |
| C(52)-C(53)-H(53) | 126.5     |
| Co(5)-C(53)-H(53) | 126.2     |
| C(50)-C(54)-C(53) | 108.9(12) |
| C(50)-C(54)-Co(5) | 70.1(7)   |
| C(53)-C(54)-Co(5) | 69.7(7)   |
| C(50)-C(54)-H(54) | 125.6     |
| C(53)-C(54)-H(54) | 125.6     |
| Co(5)-C(54)-H(54) | 126.2     |
| C(56)-C(55)-C(59) | 108.0(13) |
| C(56)-C(55)-Co(6) | 69.2(8)   |
| C(59)-C(55)-Co(6) | 69.5(8)   |
| C(56)-C(55)-H(55) | 126.0     |
| C(59)-C(55)-H(55) | 126.0     |
| Co(6)-C(55)-H(55) | 126.9     |
| C(57)-C(56)-C(55) | 108.3(12) |
| C(57)-C(56)-Co(6) | 69.3(8)   |
| C(55)-C(56)-Co(6) | 70.1(7)   |
| C(57)-C(56)-H(56) | 125.9     |
| C(55)-C(56)-H(56) | 125.8     |
| Co(6)-C(56)-H(56) | 126.3     |
| C(56)-C(57)-C(58) | 107.9(12) |
| C(56)-C(57)-Co(6) | 69.8(7)   |
| C(58)-C(57)-Co(6) | 69.1(7)   |
| C(56)-C(57)-H(57) | 126.0     |

|                     |           |
|---------------------|-----------|
| C(58)-C(57)-H(57)   | 126.0     |
| Co(6)-C(57)-H(57)   | 126.7     |
| C(59)-C(58)-C(57)   | 108.0(13) |
| C(59)-C(58)-Co(6)   | 70.3(7)   |
| C(57)-C(58)-Co(6)   | 69.7(7)   |
| C(59)-C(58)-H(58)   | 126.0     |
| C(57)-C(58)-H(58)   | 126.0     |
| Co(6)-C(58)-H(58)   | 125.6     |
| C(58)-C(59)-C(55)   | 107.7(11) |
| C(58)-C(59)-Co(6)   | 68.6(7)   |
| C(55)-C(59)-Co(6)   | 69.6(7)   |
| C(58)-C(59)-H(59)   | 126.1     |
| C(55)-C(59)-H(59)   | 126.1     |
| Co(6)-C(59)-H(59)   | 127.2     |
| C(64)-C(60)-C(61)   | 108.8(10) |
| C(64)-C(60)-Co(6)   | 70.7(6)   |
| C(61)-C(60)-Co(6)   | 69.5(6)   |
| C(64)-C(60)-H(60)   | 125.6     |
| C(61)-C(60)-H(60)   | 125.6     |
| Co(6)-C(60)-H(60)   | 125.8     |
| C(60)-C(61)-C(62)   | 108.7(9)  |
| C(60)-C(61)-Co(6)   | 69.6(6)   |
| C(62)-C(61)-Co(6)   | 70.3(6)   |
| C(60)-C(61)-H(61)   | 125.7     |
| C(62)-C(61)-H(61)   | 125.7     |
| Co(6)-C(61)-H(61)   | 126.0     |
| C(63)-C(62)-C(61)   | 106.8(10) |
| C(63)-C(62)-Co(6)   | 69.2(6)   |
| C(61)-C(62)-Co(6)   | 68.7(6)   |
| C(63)-C(62)-H(62)   | 126.6     |
| C(61)-C(62)-H(62)   | 126.6     |
| Co(6)-C(62)-H(62)   | 127.0     |
| C(62)-C(63)-C(64)   | 108.6(10) |
| C(62)-C(63)-Co(6)   | 69.9(6)   |
| C(64)-C(63)-Co(6)   | 69.9(6)   |
| C(62)-C(63)-H(63)   | 125.7     |
| C(64)-C(63)-H(63)   | 125.7     |
| Co(6)-C(63)-H(63)   | 126.1     |
| C(60)-C(64)-C(63)   | 107.1(10) |
| C(60)-C(64)-Co(6)   | 68.8(6)   |
| C(63)-C(64)-Co(6)   | 68.9(6)   |
| C(60)-C(64)-H(64)   | 126.5     |
| C(63)-C(64)-H(64)   | 126.5     |
| Co(6)-C(64)-H(64)   | 127.4     |
| N(1)-C(65)-C(66A)   | 164(2)    |
| N(1)-C(65)-C(66)    | 163(2)    |
| C(67)-C(66)-C(65)   | 108.8(19) |
| C(67)-C(66)-H(66B)  | 109.9     |
| C(65)-C(66)-H(66B)  | 109.9     |
| C(67)-C(66)-H(66A)  | 109.9     |
| C(65)-C(66)-H(66A)  | 109.9     |
| H(66B)-C(66)-H(66A) | 108.3     |
| C(66A)-C(67)-C(68)  | 125(2)    |

|                      |           |
|----------------------|-----------|
| C(66)-C(67)-C(68)    | 116.9(19) |
| C(66)-C(67)-H(67A)   | 108.1     |
| C(68)-C(67)-H(67A)   | 108.1     |
| C(66)-C(67)-H(67B)   | 108.1     |
| C(68)-C(67)-H(67B)   | 108.1     |
| H(67A)-C(67)-H(67B)  | 107.3     |
| C(66A)-C(67)-H(67C)  | 106.1     |
| C(68)-C(67)-H(67C)   | 106.1     |
| C(66A)-C(67)-H(67D)  | 106.1     |
| C(68)-C(67)-H(67D)   | 106.1     |
| H(67C)-C(67)-H(67D)  | 106.3     |
| C(67)-C(68)-H(68A)   | 109.5     |
| C(67)-C(68)-H(68B)   | 109.5     |
| H(68A)-C(68)-H(68B)  | 109.5     |
| C(67)-C(68)-H(68C)   | 109.5     |
| H(68A)-C(68)-H(68C)  | 109.5     |
| H(68B)-C(68)-H(68C)  | 109.5     |
| C(67)-C(66A)-C(65)   | 113(2)    |
| C(67)-C(66A)-H(66C)  | 109.0     |
| C(65)-C(66A)-H(66C)  | 109.0     |
| C(67)-C(66A)-H(66D)  | 109.0     |
| C(65)-C(66A)-H(66D)  | 109.0     |
| H(66C)-C(66A)-H(66D) | 107.8     |
| N(2)-C(69)-C(70)     | 177(3)    |
| C(71)-C(70)-C(69)    | 117(3)    |
| C(71)-C(70)-H(70A)   | 107.9     |
| C(69)-C(70)-H(70A)   | 107.9     |
| C(71)-C(70)-H(70B)   | 107.9     |
| C(69)-C(70)-H(70B)   | 107.9     |
| H(70A)-C(70)-H(70B)  | 107.2     |
| C(70)-C(71)-C(72)    | 117(3)    |
| C(70)-C(71)-H(71A)   | 108.0     |
| C(72)-C(71)-H(71A)   | 108.0     |
| C(70)-C(71)-H(71B)   | 108.0     |
| C(72)-C(71)-H(71B)   | 108.0     |
| H(71A)-C(71)-H(71B)  | 107.2     |
| C(71)-C(72)-H(72A)   | 109.5     |
| C(71)-C(72)-H(72B)   | 109.5     |
| H(72A)-C(72)-H(72B)  | 109.5     |
| C(71)-C(72)-H(72C)   | 109.5     |
| H(72A)-C(72)-H(72C)  | 109.5     |
| H(72B)-C(72)-H(72C)  | 109.5     |
| N(2A)-C(69A)-C(70A)  | 179(5)    |
| C(71A)-C(70A)-C(69A) | 113(3)    |
| C(71A)-C(70A)-H(70C) | 109.0     |
| C(69A)-C(70A)-H(70C) | 109.0     |
| C(71A)-C(70A)-H(70D) | 109.0     |
| C(69A)-C(70A)-H(70D) | 109.0     |
| H(70C)-C(70A)-H(70D) | 107.8     |
| C(70A)-C(71A)-C(72A) | 113(3)    |
| C(70A)-C(71A)-H(71C) | 108.9     |
| C(72A)-C(71A)-H(71C) | 108.9     |
| C(70A)-C(71A)-H(71D) | 108.9     |



|                      |       |
|----------------------|-------|
| C(72A)-C(71A)-H(71D) | 108.9 |
| H(71C)-C(71A)-H(71D) | 107.7 |
| C(71A)-C(72A)-H(72D) | 109.5 |
| C(71A)-C(72A)-H(72E) | 109.5 |
| H(72D)-C(72A)-H(72E) | 109.5 |
| C(71A)-C(72A)-H(72F) | 109.5 |
| H(72D)-C(72A)-H(72F) | 109.5 |
| H(72E)-C(72A)-H(72F) | 109.5 |

---

**Table S4:** Anisotropic displacement parameters ( $\text{\AA}^2 \times 10^3$ ) for  $[\text{CoCp}_2]_2[\text{Co}^{\text{II}}(\text{bdt})_2]$ . The anisotropic displacement factor exponent takes the form:  $-2 \pi^2 [h^2 a^{*2} U_{11} + \dots + 2 h k a^* b^* U_{12}]$

|       | U11   | U22   | U33   | U23    | U13    | U12    |
|-------|-------|-------|-------|--------|--------|--------|
| Co(1) | 29(1) | 36(1) | 34(1) | -3(1)  | 1(1)   | 3(1)   |
| Co(2) | 32(1) | 32(1) | 37(1) | 0(1)   | 2(1)   | 2(1)   |
| Co(3) | 52(1) | 84(2) | 46(1) | -20(1) | 16(1)  | -3(1)  |
| Co(4) | 42(1) | 58(1) | 43(1) | -10(1) | 14(1)  | -9(1)  |
| Co(5) | 41(1) | 43(1) | 38(1) | -2(1)  | 2(1)   | 4(1)   |
| Co(6) | 46(1) | 38(1) | 36(1) | 6(1)   | 10(1)  | 8(1)   |
| S(1)  | 32(1) | 38(1) | 42(1) | 2(1)   | -3(1)  | 2(1)   |
| S(2)  | 31(1) | 41(1) | 42(1) | -3(1)  | 3(1)   | 2(1)   |
| S(3)  | 32(1) | 39(1) | 41(1) | -2(1)  | 3(1)   | -2(1)  |
| S(4)  | 30(1) | 34(1) | 39(1) | 1(1)   | 0(1)   | 2(1)   |
| S(5)  | 32(1) | 33(1) | 50(1) | 0(1)   | 1(1)   | 0(1)   |
| S(6)  | 35(1) | 34(1) | 43(1) | -2(1)  | -1(1)  | 3(1)   |
| S(7)  | 35(1) | 34(1) | 41(1) | -3(1)  | -1(1)  | 2(1)   |
| S(8)  | 34(1) | 32(1) | 43(1) | 1(1)   | 1(1)   | 1(1)   |
| Cl(1) | 45(1) | 49(2) | 72(2) | 16(1)  | -11(1) | -5(1)  |
| Cl(2) | 32(1) | 57(2) | 61(2) | 2(1)   | 3(1)   | 2(1)   |
| Cl(3) | 50(1) | 44(2) | 61(2) | 4(1)   | 6(1)   | -12(1) |
| Cl(4) | 32(1) | 42(1) | 64(2) | 6(1)   | -1(1)  | 2(1)   |
| Cl(5) | 42(1) | 36(1) | 89(2) | -5(1)  | 0(1)   | 2(1)   |
| Cl(6) | 41(1) | 42(2) | 63(2) | -6(1)  | -9(1)  | 5(1)   |
| Cl(7) | 46(1) | 35(1) | 62(2) | -7(1)  | -7(1)  | 2(1)   |
| Cl(8) | 37(1) | 40(1) | 54(1) | 1(1)   | -6(1)  | -2(1)  |
| C(1)  | 34(5) | 40(6) | 31(4) | -2(4)  | 2(4)   | 4(4)   |
| C(2)  | 41(6) | 43(6) | 41(5) | -3(5)  | -1(4)  | -2(5)  |
| C(3)  | 47(6) | 36(6) | 43(5) | 4(4)   | 3(5)   | 6(5)   |
| C(4)  | 37(6) | 51(7) | 44(5) | -3(5)  | -1(5)  | 10(5)  |
| C(5)  | 29(5) | 57(7) | 38(5) | -2(5)  | 1(4)   | 3(5)   |
| C(6)  | 38(5) | 41(6) | 35(5) | -10(4) | 0(4)   | 8(5)   |
| C(7)  | 34(5) | 36(5) | 32(4) | -2(4)  | 4(4)   | -2(4)  |
| C(8)  | 43(6) | 39(6) | 38(5) | 1(4)   | 7(4)   | -1(5)  |
| C(9)  | 57(6) | 31(5) | 36(5) | 1(4)   | 2(5)   | 1(5)   |
| C(10) | 35(5) | 42(6) | 41(5) | 2(5)   | -3(4)  | 5(5)   |
| C(11) | 38(5) | 35(5) | 39(5) | 3(4)   | 1(4)   | -1(4)  |
| C(12) | 40(5) | 32(5) | 31(4) | -5(4)  | 6(4)   | -5(4)  |
| C(13) | 35(5) | 41(6) | 41(5) | 4(4)   | 12(4)  | 4(4)   |
| C(14) | 37(6) | 39(6) | 59(7) | -1(5)  | 11(5)  | -2(5)  |
| C(15) | 41(6) | 39(6) | 50(6) | 2(5)   | 10(5)  | 7(5)   |
| C(16) | 37(5) | 39(6) | 55(6) | 4(5)   | 4(5)   | 10(5)  |
| C(17) | 37(5) | 51(7) | 46(6) | -4(5)  | 6(4)   | 3(5)   |
| C(18) | 32(5) | 38(6) | 36(5) | -1(4)  | 5(4)   | 0(4)   |
| C(19) | 37(5) | 37(6) | 38(5) | 5(4)   | 6(4)   | 4(4)   |
| C(20) | 41(6) | 33(5) | 43(5) | -5(4)  | 4(4)   | 1(4)   |
| C(21) | 40(5) | 34(6) | 46(5) | -6(4)  | 2(4)   | 7(4)   |

|        |         |         |         |         |         |         |
|--------|---------|---------|---------|---------|---------|---------|
| C(22)  | 35(5)   | 46(6)   | 39(5)   | -2(5)   | 1(4)    | 10(5)   |
| C(23)  | 34(5)   | 32(5)   | 40(5)   | -2(4)   | 3(4)    | 2(4)    |
| C(24)  | 32(5)   | 36(6)   | 34(4)   | -2(4)   | 3(4)    | -3(4)   |
| C(25)  | 49(7)   | 129(16) | 56(7)   | -26(9)  | 4(6)    | -12(8)  |
| C(26)  | 47(7)   | 103(12) | 63(7)   | -17(8)  | 22(6)   | -12(8)  |
| C(27)  | 61(8)   | 93(11)  | 38(6)   | -2(6)   | 13(6)   | 10(8)   |
| C(28)  | 50(7)   | 91(11)  | 57(7)   | -5(7)   | 8(6)    | 3(7)    |
| C(29)  | 69(9)   | 104(13) | 45(6)   | -12(7)  | 19(6)   | 7(8)    |
| C(30)  | 73(9)   | 87(11)  | 58(7)   | -22(8)  | 26(7)   | -2(8)   |
| C(31)  | 88(11)  | 77(11)  | 97(12)  | -44(10) | 45(10)  | -7(9)   |
| C(32)  | 97(12)  | 61(9)   | 85(10)  | -9(8)   | 41(9)   | 3(9)    |
| C(33)  | 82(10)  | 84(11)  | 54(7)   | -10(7)  | 23(7)   | 25(9)   |
| C(34)  | 59(8)   | 84(11)  | 66(8)   | -26(8)  | 13(6)   | 10(8)   |
| C(35)  | 61(8)   | 75(10)  | 51(7)   | -8(6)   | 8(6)    | 21(7)   |
| C(36)  | 62(8)   | 46(7)   | 66(8)   | -6(6)   | 14(6)   | 9(6)    |
| C(37)  | 78(9)   | 61(9)   | 60(7)   | 6(6)    | 21(7)   | 20(7)   |
| C(38)  | 49(7)   | 146(17) | 49(7)   | 4(9)    | -1(6)   | 23(9)   |
| C(39)  | 35(7)   | 145(17) | 66(8)   | -17(10) | 1(6)    | 26(8)   |
| C(40)  | 122(13) | 42(7)   | 60(8)   | 5(6)    | 46(8)   | 18(8)   |
| C(41)  | 146(16) | 69(10)  | 59(8)   | -21(7)  | 43(9)   | -61(11) |
| C(42)  | 111(13) | 90(12)  | 59(8)   | -14(8)  | 39(9)   | -54(10) |
| C(43)  | 73(8)   | 57(8)   | 48(6)   | -7(6)   | 21(6)   | -6(7)   |
| C(44)  | 76(9)   | 58(8)   | 54(7)   | 2(6)    | 28(7)   | 17(7)   |
| C(45)  | 60(7)   | 46(7)   | 36(5)   | -4(5)   | 1(5)    | 11(5)   |
| C(46)  | 50(6)   | 48(7)   | 50(6)   | 3(5)    | 18(5)   | 4(5)    |
| C(47)  | 38(5)   | 47(7)   | 47(6)   | -10(5)  | 3(5)    | -4(5)   |
| C(48)  | 36(5)   | 41(6)   | 43(5)   | 2(4)    | 6(4)    | 1(4)    |
| C(49)  | 47(6)   | 42(6)   | 38(5)   | -4(5)   | -9(5)   | 4(5)    |
| C(50)  | 64(7)   | 50(7)   | 44(6)   | 0(5)    | 10(5)   | 13(6)   |
| C(51)  | 62(7)   | 40(6)   | 49(6)   | 7(5)    | -1(5)   | 6(6)    |
| C(52)  | 52(6)   | 58(8)   | 46(6)   | 0(5)    | 2(5)    | 7(6)    |
| C(53)  | 47(6)   | 60(8)   | 46(6)   | -7(5)   | -5(5)   | 7(6)    |
| C(54)  | 53(7)   | 63(8)   | 56(7)   | 14(6)   | 18(6)   | 20(6)   |
| C(55)  | 63(7)   | 41(6)   | 59(7)   | 13(5)   | 24(6)   | 14(6)   |
| C(56)  | 65(8)   | 53(8)   | 65(8)   | 22(6)   | 22(7)   | 19(7)   |
| C(57)  | 73(8)   | 66(9)   | 45(6)   | 18(6)   | 15(6)   | 32(7)   |
| C(58)  | 60(7)   | 56(8)   | 44(6)   | 9(5)    | 1(5)    | 19(6)   |
| C(59)  | 56(7)   | 46(6)   | 49(6)   | 15(5)   | 12(5)   | 9(5)    |
| C(60)  | 44(6)   | 42(6)   | 46(5)   | 5(5)    | 10(5)   | 11(5)   |
| C(61)  | 56(7)   | 45(6)   | 36(5)   | -2(5)   | 8(5)    | 14(5)   |
| C(62)  | 44(6)   | 38(6)   | 41(5)   | 7(4)    | 3(4)    | 3(5)    |
| C(63)  | 52(6)   | 38(6)   | 42(5)   | 2(5)    | 4(5)    | 2(5)    |
| C(64)  | 47(6)   | 39(6)   | 42(5)   | -3(4)   | 4(5)    | 0(5)    |
| N(1)   | 93(9)   | 71(9)   | 73(8)   | 12(7)   | 4(7)    | 10(6)   |
| C(65)  | 77(9)   | 102(11) | 56(8)   | 1(8)    | 18(7)   | 2(7)    |
| C(66)  | 64(13)  | 108(13) | 47(13)  | -4(13)  | 37(11)  | 7(10)   |
| C(67)  | 110(15) | 99(12)  | 150(20) | 14(12)  | 36(14)  | -4(10)  |
| C(68)  | 81(10)  | 110(12) | 67(9)   | -1(9)   | 29(8)   | 10(9)   |
| C(66A) | 150(30) | 130(20) | 70(20)  | 1(17)   | 10(20)  | -50(20) |
| N(2)   | 210(40) | 130(20) | 100(30) | 27(19)  | 100(30) | -20(20) |
| C(69)  | 89(19)  | 124(18) | 35(11)  | 7(11)   | 10(12)  | -54(16) |
| C(70)  | 120(20) | 112(19) | 77(16)  | -7(15)  | 25(15)  | -50(16) |
| C(71)  | 110(20) | 100(20) | 160(30) | -30(20) | 30(20)  | -33(19) |

|        |         |         |         |         |         |         |
|--------|---------|---------|---------|---------|---------|---------|
| C(72)  | 100(20) | 100(30) | 160(30) | -40(20) | 30(19)  | -20(20) |
| N(2A)  | 50(20)  | 68(19)  | 110(40) | 20(20)  | -50(30) | -16(15) |
| C(69A) | 60(20)  | 70(17)  | 50(20)  | 9(16)   | -18(18) | -18(15) |
| C(70A) | 90(20)  | 78(19)  | 50(20)  | 13(16)  | 18(18)  | -35(15) |
| C(71A) | 120(30) | 80(20)  | 50(20)  | -15(18) | 37(18)  | -50(20) |
| C(72A) | 90(30)  | 100(40) | 100(30) | 20(30)  | 50(20)  | -30(20) |

---

**Table S5:** Hydrogen coordinates ( $\times 10^4$ ) and isotropic displacement parameters ( $\text{\AA}^2 \times 10^3$ ) for  $[\text{CoCp}_2]_2[\text{Co}^{\text{II}}(\text{bdt})_2]$ .

|       | x    | y     | z     | U(eq) |
|-------|------|-------|-------|-------|
| H(3)  | 528  | 13791 | -129  | 51    |
| H(4)  | -826 | 12830 | -202  | 54    |
| H(9)  | 4328 | 6009  | 2652  | 50    |
| H(10) | 5658 | 6992  | 2688  | 49    |
| H(15) | 466  | 13763 | 5098  | 52    |
| H(16) | -588 | 12649 | 4468  | 53    |
| H(21) | 4690 | 5992  | 7429  | 49    |
| H(22) | 5771 | 7132  | 7991  | 49    |
| H(25) | 2626 | 659   | 9443  | 94    |
| H(26) | 3110 | 246   | 8222  | 83    |
| H(27) | 2016 | -1054 | 7636  | 76    |
| H(28) | 904  | -1484 | 8521  | 79    |
| H(29) | 1277 | -407  | 9634  | 86    |
| H(30) | -332 | 1088  | 8775  | 85    |
| H(31) | 990  | 2232  | 8699  | 101   |
| H(32) | 1606 | 1916  | 7496  | 93    |
| H(33) | 622  | 589   | 6832  | 86    |
| H(34) | -582 | 67    | 7630  | 83    |
| H(35) | 4471 | 5314  | 8998  | 75    |
| H(36) | 3068 | 5203  | 9655  | 69    |
| H(37) | 3550 | 5829  | 10947 | 78    |
| H(38) | 5283 | 6359  | 11088 | 99    |
| H(39) | 5833 | 6002  | 9881  | 99    |
| H(40) | 2947 | 8000  | 10426 | 85    |
| H(41) | 4648 | 8517  | 10475 | 106   |
| H(42) | 5120 | 8107  | 9238  | 101   |
| H(43) | 3680 | 7476  | 8406  | 69    |
| H(44) | 2357 | 7299  | 9178  | 73    |
| H(45) | 2445 | 1855  | 4564  | 58    |
| H(46) | 1045 | 932   | 3833  | 58    |
| H(47) | 1461 | 535   | 2593  | 54    |
| H(48) | 3065 | 1238  | 2509  | 48    |
| H(49) | 3664 | 2075  | 3720  | 53    |
| H(50) | 1320 | 3843  | 3877  | 63    |
| H(51) | 2644 | 4084  | 3129  | 62    |
| H(52) | 2170 | 3269  | 1895  | 63    |
| H(53) | 546  | 2507  | 1878  | 63    |
| H(54) | 30   | 2883  | 3105  | 68    |
| H(55) | 4342 | 7004  | 4099  | 63    |
| H(56) | 3879 | 7486  | 5316  | 72    |
| H(57) | 5186 | 8517  | 5999  | 73    |
| H(58) | 6451 | 8706  | 5190  | 65    |
| H(59) | 5944 | 7746  | 4023  | 60    |

|        |      |       |      |     |
|--------|------|-------|------|-----|
| H(60)  | 2847 | 9409  | 4570 | 52  |
| H(61)  | 4167 | 10381 | 5283 | 55  |
| H(62)  | 5455 | 10586 | 4495 | 50  |
| H(63)  | 4909 | 9715  | 3290 | 53  |
| H(64)  | 3275 | 9008  | 3329 | 51  |
| H(66B) | 8603 | 1291  | 6666 | 84  |
| H(66A) | 8937 | 1411  | 5881 | 84  |
| H(67A) | 7614 | 2583  | 6431 | 141 |
| H(67B) | 7872 | 2683  | 5624 | 141 |
| H(67C) | 7864 | 2291  | 6573 | 141 |
| H(67D) | 7627 | 2880  | 5831 | 141 |
| H(68A) | 9526 | 2901  | 6509 | 126 |
| H(68B) | 8788 | 3497  | 6894 | 126 |
| H(68C) | 8919 | 3739  | 6068 | 126 |
| H(66C) | 8909 | 1428  | 5901 | 139 |
| H(66D) | 8215 | 1850  | 5206 | 139 |
| H(70A) | 9773 | -119  | 2241 | 122 |
| H(70B) | 9503 | 67    | 3035 | 122 |
| H(71A) | 7999 | -454  | 2624 | 149 |
| H(71B) | 8782 | -1250 | 2580 | 149 |
| H(72A) | 7652 | -324  | 1396 | 175 |
| H(72B) | 7771 | -1447 | 1539 | 175 |
| H(72C) | 8607 | -849  | 1276 | 175 |
| H(70C) | 7784 | 24    | 2561 | 88  |
| H(70D) | 7345 | 221   | 1719 | 88  |
| H(71C) | 8643 | -466  | 1346 | 95  |
| H(71D) | 8131 | -1198 | 1819 | 95  |
| H(72D) | 9557 | -206  | 2695 | 140 |
| H(72E) | 9947 | -819  | 2076 | 140 |
| H(72F) | 9390 | -1335 | 2651 | 140 |

---

**Table S6:** Torsion angles [deg] for [CoCp<sub>2</sub>]<sub>2</sub>[Co<sup>II</sup>(bdt)<sub>2</sub>].

---

|                         |           |
|-------------------------|-----------|
| Co(1)-S(1)-C(1)-C(2)    | 178.8(8)  |
| Co(1)-S(1)-C(1)-C(6)    | -1.7(8)   |
| C(6)-C(1)-C(2)-C(3)     | -1.8(15)  |
| S(1)-C(1)-C(2)-C(3)     | 177.7(9)  |
| C(6)-C(1)-C(2)-Cl(1)    | -179.8(8) |
| S(1)-C(1)-C(2)-Cl(1)    | -0.3(13)  |
| C(1)-C(2)-C(3)-C(4)     | -0.8(17)  |
| Cl(1)-C(2)-C(3)-C(4)    | 177.2(8)  |
| C(2)-C(3)-C(4)-C(5)     | 1.1(16)   |
| C(3)-C(4)-C(5)-C(6)     | 1.3(17)   |
| C(3)-C(4)-C(5)-Cl(2)    | -176.6(8) |
| C(4)-C(5)-C(6)-C(1)     | -3.9(15)  |
| Cl(2)-C(5)-C(6)-C(1)    | 174.0(7)  |
| C(4)-C(5)-C(6)-S(2)     | 177.4(8)  |
| Cl(2)-C(5)-C(6)-S(2)    | -4.7(12)  |
| C(2)-C(1)-C(6)-C(5)     | 4.0(14)   |
| S(1)-C(1)-C(6)-C(5)     | -175.5(7) |
| C(2)-C(1)-C(6)-S(2)     | -177.2(8) |
| S(1)-C(1)-C(6)-S(2)     | 3.3(11)   |
| Co(1)-S(2)-C(6)-C(5)    | 175.5(8)  |
| Co(1)-S(2)-C(6)-C(1)    | -3.2(8)   |
| Co(1)-S(3)-C(7)-C(8)    | -176.5(8) |
| Co(1)-S(3)-C(7)-C(12)   | 2.2(8)    |
| C(12)-C(7)-C(8)-C(9)    | 2.9(15)   |
| S(3)-C(7)-C(8)-C(9)     | -178.4(8) |
| C(12)-C(7)-C(8)-Cl(3)   | -174.2(7) |
| S(3)-C(7)-C(8)-Cl(3)    | 4.6(12)   |
| C(7)-C(8)-C(9)-C(10)    | -1.6(16)  |
| Cl(3)-C(8)-C(9)-C(10)   | 175.5(8)  |
| C(8)-C(9)-C(10)-C(11)   | -0.7(16)  |
| C(9)-C(10)-C(11)-C(12)  | 1.5(16)   |
| C(9)-C(10)-C(11)-Cl(4)  | -177.6(8) |
| C(10)-C(11)-C(12)-C(7)  | -0.2(15)  |
| Cl(4)-C(11)-C(12)-C(7)  | 179.0(7)  |
| C(10)-C(11)-C(12)-S(4)  | 179.9(8)  |
| Cl(4)-C(11)-C(12)-S(4)  | -0.9(12)  |
| C(8)-C(7)-C(12)-C(11)   | -2.0(13)  |
| S(3)-C(7)-C(12)-C(11)   | 179.2(7)  |
| C(8)-C(7)-C(12)-S(4)    | 177.9(7)  |
| S(3)-C(7)-C(12)-S(4)    | -0.9(11)  |
| Co(1)-S(4)-C(12)-C(11)  | 179.0(8)  |
| Co(1)-S(4)-C(12)-C(7)   | -1.0(8)   |
| Co(2)-S(5)-C(13)-C(14)  | -178.7(8) |
| Co(2)-S(5)-C(13)-C(18)  | 0.8(8)    |
| C(18)-C(13)-C(14)-C(15) | -1.8(16)  |
| S(5)-C(13)-C(14)-C(15)  | 177.8(9)  |
| C(18)-C(13)-C(14)-Cl(5) | 179.5(8)  |
| S(5)-C(13)-C(14)-Cl(5)  | -1.0(13)  |
| C(13)-C(14)-C(15)-C(16) | -0.2(17)  |

|                         |           |
|-------------------------|-----------|
| Cl(5)-C(14)-C(15)-C(16) | 178.6(9)  |
| C(14)-C(15)-C(16)-C(17) | 2.7(16)   |
| C(15)-C(16)-C(17)-C(18) | -3.4(17)  |
| C(15)-C(16)-C(17)-Cl(6) | 179.4(8)  |
| C(16)-C(17)-C(18)-C(13) | 1.5(16)   |
| Cl(6)-C(17)-C(18)-C(13) | 178.6(8)  |
| C(16)-C(17)-C(18)-S(6)  | -176.4(9) |
| Cl(6)-C(17)-C(18)-S(6)  | 0.8(13)   |
| C(14)-C(13)-C(18)-C(17) | 1.1(14)   |
| S(5)-C(13)-C(18)-C(17)  | -178.4(8) |
| C(14)-C(13)-C(18)-S(6)  | 179.1(8)  |
| S(5)-C(13)-C(18)-S(6)   | -0.5(11)  |
| Co(2)-S(6)-C(18)-C(17)  | 177.7(8)  |
| Co(2)-S(6)-C(18)-C(13)  | -0.1(9)   |
| Co(2)-S(7)-C(19)-C(20)  | -179.5(8) |
| Co(2)-S(7)-C(19)-C(24)  | -1.1(9)   |
| C(24)-C(19)-C(20)-C(21) | 2.5(16)   |
| S(7)-C(19)-C(20)-C(21)  | -179.1(8) |
| C(24)-C(19)-C(20)-Cl(7) | -175.9(8) |
| S(7)-C(19)-C(20)-Cl(7)  | 2.5(13)   |
| C(19)-C(20)-C(21)-C(22) | -1.6(16)  |
| Cl(7)-C(20)-C(21)-C(22) | 176.9(8)  |
| C(20)-C(21)-C(22)-C(23) | 0.1(16)   |
| C(21)-C(22)-C(23)-C(24) | 0.3(16)   |
| C(21)-C(22)-C(23)-Cl(8) | -178.9(8) |
| C(22)-C(23)-C(24)-C(19) | 0.7(15)   |
| Cl(8)-C(23)-C(24)-C(19) | 179.8(8)  |
| C(22)-C(23)-C(24)-S(8)  | -178.7(8) |
| Cl(8)-C(23)-C(24)-S(8)  | 0.4(12)   |
| C(20)-C(19)-C(24)-C(23) | -2.0(14)  |
| S(7)-C(19)-C(24)-C(23)  | 179.5(7)  |
| C(20)-C(19)-C(24)-S(8)  | 177.4(8)  |
| S(7)-C(19)-C(24)-S(8)   | -1.0(12)  |
| Co(2)-S(8)-C(24)-C(23)  | -177.9(7) |
| Co(2)-S(8)-C(24)-C(19)  | 2.7(9)    |
| C(29)-C(25)-C(26)-C(27) | 1(2)      |
| Co(3)-C(25)-C(26)-C(27) | -59.2(12) |
| C(29)-C(25)-C(26)-Co(3) | 60.2(12)  |
| C(25)-C(26)-C(27)-C(28) | -1.3(19)  |
| Co(3)-C(26)-C(27)-C(28) | -60.2(11) |
| C(25)-C(26)-C(27)-Co(3) | 58.9(12)  |
| C(26)-C(27)-C(28)-C(29) | 1.1(18)   |
| Co(3)-C(27)-C(28)-C(29) | -59.1(11) |
| C(26)-C(27)-C(28)-Co(3) | 60.2(11)  |
| C(26)-C(25)-C(29)-C(28) | 0(2)      |
| Co(3)-C(25)-C(29)-C(28) | 59.9(12)  |
| C(26)-C(25)-C(29)-Co(3) | -60.2(13) |
| C(27)-C(28)-C(29)-C(25) | -0.5(19)  |
| Co(3)-C(28)-C(29)-C(25) | -59.5(12) |
| C(27)-C(28)-C(29)-Co(3) | 59.0(11)  |
| C(34)-C(30)-C(31)-C(32) | 0(2)      |
| Co(3)-C(30)-C(31)-C(32) | 58.4(13)  |
| C(34)-C(30)-C(31)-Co(3) | -58.9(12) |



|                         |           |
|-------------------------|-----------|
| C(30)-C(31)-C(32)-C(33) | 1(2)      |
| Co(3)-C(31)-C(32)-C(33) | 60.1(12)  |
| C(30)-C(31)-C(32)-Co(3) | -59.5(14) |
| C(31)-C(32)-C(33)-C(34) | -1(2)     |
| Co(3)-C(32)-C(33)-C(34) | 59.6(11)  |
| C(31)-C(32)-C(33)-Co(3) | -60.2(13) |
| C(31)-C(30)-C(34)-C(33) | 0(2)      |
| Co(3)-C(30)-C(34)-C(33) | -58.7(11) |
| C(31)-C(30)-C(34)-Co(3) | 58.9(13)  |
| C(32)-C(33)-C(34)-C(30) | 0.2(19)   |
| Co(3)-C(33)-C(34)-C(30) | 59.4(12)  |
| C(32)-C(33)-C(34)-Co(3) | -59.2(12) |
| C(39)-C(35)-C(36)-C(37) | 0.2(18)   |
| Co(4)-C(35)-C(36)-C(37) | -59.3(10) |
| C(39)-C(35)-C(36)-Co(4) | 59.5(12)  |
| C(35)-C(36)-C(37)-C(38) | 0.4(17)   |
| Co(4)-C(36)-C(37)-C(38) | -59.1(12) |
| C(35)-C(36)-C(37)-Co(4) | 59.5(10)  |
| C(36)-C(37)-C(38)-C(39) | -1(2)     |
| Co(4)-C(37)-C(38)-C(39) | -60.0(13) |
| C(36)-C(37)-C(38)-Co(4) | 59.2(10)  |
| C(36)-C(35)-C(39)-C(38) | -1(2)     |
| Co(4)-C(35)-C(39)-C(38) | 58.8(14)  |
| C(36)-C(35)-C(39)-Co(4) | -59.5(10) |
| C(37)-C(38)-C(39)-C(35) | 1(2)      |
| Co(4)-C(38)-C(39)-C(35) | -58.8(13) |
| C(37)-C(38)-C(39)-Co(4) | 59.8(12)  |
| C(44)-C(40)-C(41)-C(42) | 0(2)      |
| Co(4)-C(40)-C(41)-C(42) | 58.3(13)  |
| C(44)-C(40)-C(41)-Co(4) | -58.7(10) |
| C(40)-C(41)-C(42)-C(43) | 3(2)      |
| Co(4)-C(41)-C(42)-C(43) | 61.7(13)  |
| C(40)-C(41)-C(42)-Co(4) | -58.9(12) |
| C(41)-C(42)-C(43)-C(44) | -4(2)     |
| Co(4)-C(42)-C(43)-C(44) | 56.8(11)  |
| C(41)-C(42)-C(43)-Co(4) | -60.8(13) |
| C(41)-C(40)-C(44)-C(43) | -2.1(17)  |
| Co(4)-C(40)-C(44)-C(43) | -60.8(10) |
| C(41)-C(40)-C(44)-Co(4) | 58.7(12)  |
| C(42)-C(43)-C(44)-C(40) | 3.8(17)   |
| Co(4)-C(43)-C(44)-C(40) | 60.4(10)  |
| C(42)-C(43)-C(44)-Co(4) | -56.6(12) |
| C(49)-C(45)-C(46)-C(47) | 1.6(13)   |
| Co(5)-C(45)-C(46)-C(47) | 59.8(8)   |
| C(49)-C(45)-C(46)-Co(5) | -58.1(8)  |
| C(45)-C(46)-C(47)-C(48) | -1.2(14)  |
| Co(5)-C(46)-C(47)-C(48) | 58.7(8)   |
| C(45)-C(46)-C(47)-Co(5) | -59.9(8)  |
| C(46)-C(47)-C(48)-C(49) | 0.3(13)   |
| Co(5)-C(47)-C(48)-C(49) | 59.1(8)   |
| C(46)-C(47)-C(48)-Co(5) | -58.8(9)  |
| C(46)-C(45)-C(49)-C(48) | -1.5(13)  |
| Co(5)-C(45)-C(49)-C(48) | -59.6(8)  |

|                          |            |
|--------------------------|------------|
| C(46)-C(45)-C(49)-Co(5)  | 58.2(8)    |
| C(47)-C(48)-C(49)-C(45)  | 0.8(13)    |
| Co(5)-C(48)-C(49)-C(45)  | 60.2(8)    |
| C(47)-C(48)-C(49)-Co(5)  | -59.4(8)   |
| C(54)-C(50)-C(51)-C(52)  | -0.1(14)   |
| Co(5)-C(50)-C(51)-C(52)  | 58.9(9)    |
| C(54)-C(50)-C(51)-Co(5)  | -59.0(9)   |
| C(50)-C(51)-C(52)-C(53)  | -0.2(14)   |
| Co(5)-C(51)-C(52)-C(53)  | 58.5(9)    |
| C(50)-C(51)-C(52)-Co(5)  | -58.7(8)   |
| C(51)-C(52)-C(53)-C(54)  | 0.4(14)    |
| Co(5)-C(52)-C(53)-C(54)  | 59.3(9)    |
| C(51)-C(52)-C(53)-Co(5)  | -58.9(8)   |
| C(51)-C(50)-C(54)-C(53)  | 0.3(14)    |
| Co(5)-C(50)-C(54)-C(53)  | -59.1(9)   |
| C(51)-C(50)-C(54)-Co(5)  | 59.4(8)    |
| C(52)-C(53)-C(54)-C(50)  | -0.4(15)   |
| Co(5)-C(53)-C(54)-C(50)  | 59.4(9)    |
| C(52)-C(53)-C(54)-Co(5)  | -59.8(9)   |
| C(59)-C(55)-C(56)-C(57)  | -0.2(14)   |
| Co(6)-C(55)-C(56)-C(57)  | -59.0(9)   |
| C(59)-C(55)-C(56)-Co(6)  | 58.8(8)    |
| C(55)-C(56)-C(57)-C(58)  | 0.7(14)    |
| Co(6)-C(56)-C(57)-C(58)  | -58.7(8)   |
| C(55)-C(56)-C(57)-Co(6)  | 59.4(9)    |
| C(56)-C(57)-C(58)-C(59)  | -1.0(14)   |
| Co(6)-C(57)-C(58)-C(59)  | -60.1(8)   |
| C(56)-C(57)-C(58)-Co(6)  | 59.1(9)    |
| C(57)-C(58)-C(59)-C(55)  | 0.9(13)    |
| Co(6)-C(58)-C(59)-C(55)  | -58.8(8)   |
| C(57)-C(58)-C(59)-Co(6)  | 59.7(8)    |
| C(56)-C(55)-C(59)-C(58)  | -0.5(13)   |
| Co(6)-C(55)-C(59)-C(58)  | 58.2(8)    |
| C(56)-C(55)-C(59)-Co(6)  | -58.7(8)   |
| C(64)-C(60)-C(61)-C(62)  | -0.4(13)   |
| Co(6)-C(60)-C(61)-C(62)  | 59.6(8)    |
| C(64)-C(60)-C(61)-Co(6)  | -60.0(8)   |
| C(60)-C(61)-C(62)-C(63)  | -0.2(12)   |
| Co(6)-C(61)-C(62)-C(63)  | 59.0(8)    |
| C(60)-C(61)-C(62)-Co(6)  | -59.2(8)   |
| C(61)-C(62)-C(63)-C(64)  | 0.7(12)    |
| Co(6)-C(62)-C(63)-C(64)  | 59.3(8)    |
| C(61)-C(62)-C(63)-Co(6)  | -58.6(7)   |
| C(61)-C(60)-C(64)-C(63)  | 0.8(13)    |
| Co(6)-C(60)-C(64)-C(63)  | -58.5(8)   |
| C(61)-C(60)-C(64)-Co(6)  | 59.2(8)    |
| C(62)-C(63)-C(64)-C(60)  | -0.9(13)   |
| Co(6)-C(63)-C(64)-C(60)  | 58.4(8)    |
| C(62)-C(63)-C(64)-Co(6)  | -59.3(8)   |
| N(1)-C(65)-C(66)-C(67)   | -130(7)    |
| C(65)-C(66)-C(67)-C(68)  | -176.0(18) |
| C(68)-C(67)-C(66A)-C(65) | 154(2)     |
| N(1)-C(65)-C(66A)-C(67)  | 123(7)     |

|                             |       |
|-----------------------------|-------|
| C(69)-C(70)-C(71)-C(72)     | 64(5) |
| C(69A)-C(70A)-C(71A)-C(72A) | 60(5) |

---
